# Supplementary material for: Functional tuning of organic dyes containing 2,7-carbazole and other electron-rich segments in the conjugation pathway
Source: Royal Society of Chemistry journal article supplement (doi:10.1039/c4ra15234d), 2015-01-01
Supplement: c4ra15234d1.pdf [file c4ra15234d1.pdf]

# Functional tuning of organic dyes containing 2,7-carbazole and other electron-rich segments in the conjugation pathway

A. Venkateswararao,<sup>a</sup> K. R. Justin Thomas,<sup>\*a</sup> Chun-Ting Li<sup>b</sup> and Kuo-Chuan Ho<sup>b</sup>

<sup>a</sup> *Organic Materials Laboratory, Department of Chemistry, Indian Institute of Technology*

*Roorkee, Roorkee-247 667, India. E-mail: krjt8fcy@iitr.ernet.in. Phone: +91-1332-285376*

<sup>b</sup> *Department of Chemical Engineering, National Taiwan University, Taipei 10617, Taiwan*

## Supporting Information

|                                                                                                                             |           |
|-----------------------------------------------------------------------------------------------------------------------------|-----------|
| <b>Fig. S1</b> Absorption spectra of precursor derivatives <b>2</b> and <b>3a-3e</b> recorded in dichloromethane solutions. | <b>S4</b> |
| <b>Fig. S2</b> Absorption spectra of the dyes ( <b>4a-4e</b> ) recorded in toluene solutions.                               | <b>S4</b> |
| <b>Fig. S3</b> Absorption spectra of the dyes ( <b>4a-4e</b> ) recorded in tetrahydrofuran solutions.                       | <b>S5</b> |
| <b>Fig. S4</b> Absorption spectra of the dyes ( <b>4a-4e</b> ) recorded in <i>N,N</i> -dimethyl formamide solutions.        | <b>S5</b> |
| <b>Fig. S5</b> Absorption spectra of the dye <b>4a</b> recorded in different solvents.                                      | <b>S6</b> |
| <b>Fig. S6</b> Absorption spectra of the dye <b>4b</b> recorded in different solvents.                                      | <b>S6</b> |
| <b>Fig. S7</b> Absorption spectra of the dye <b>4d</b> recorded in different solvents.                                      | <b>S7</b> |
| <b>Fig. S8</b> Absorption spectra of the dye <b>4e</b> recorded in different solvents.                                      | <b>S7</b> |
| <b>Fig. S9</b> Absorption spectra of the dye <b>4a</b> recorded in dichloromethane, after the addition of TFA and TEA.      | <b>S8</b> |
| <b>Fig. S10</b> Absorption spectra of the dye <b>4b</b> recorded in dichloromethane, after the addition of TFA and TEA.     | <b>S8</b> |
| <b>Fig. S11</b> Absorption spectra of the dye <b>4d</b> recorded in dichloromethane, after the addition of TFA and TEA.     | <b>S9</b> |

|                                                                                                                                                           |            |
|-----------------------------------------------------------------------------------------------------------------------------------------------------------|------------|
| <b>Fig. S12</b> Absorption spectra of the dye <b>4e</b> recorded in dichloromethane, after the addition of TFA and TEA.                                   | <b>S9</b>  |
| <b>Fig. S13</b> Emission spectra of the carbazole precursor and aldehyde derivatives ( <b>2</b> and <b>3a-3e</b> ) recorded in dichloromethane solutions. | <b>S10</b> |
| <b>Fig. S14</b> Emission spectra of the dye ( <b>4b</b> ) recorded in different solvents.                                                                 | <b>S10</b> |
| <b>Fig. S15</b> Emission spectra of the dye ( <b>4c</b> ) recorded in different solvents.                                                                 | <b>S11</b> |
| <b>Fig. S16</b> Emission spectra of the dye ( <b>4d</b> ) recorded in different solvents.                                                                 | <b>S11</b> |
| <b>Fig. S17</b> Emission spectra of the dyes ( <b>4e</b> ) recorded in different solvents.                                                                | <b>S12</b> |
| <b>Fig. S18</b> Lippert-Mataga plot of the dye <b>4b</b> .                                                                                                | <b>S12</b> |
| <b>Fig. S19</b> $E_T(30)$ plot of the dye <b>4b</b> .                                                                                                     | <b>S13</b> |
| <b>Fig. S20</b> Lippert-Mataga plot of the dye <b>4c</b> .                                                                                                | <b>S13</b> |
| <b>Fig. S21</b> $E_T(30)$ plot of the dye <b>4c</b> .                                                                                                     | <b>S14</b> |
| <b>Fig. S22</b> Lippert-Mataga plot of the dye <b>4e</b> .                                                                                                | <b>S14</b> |
| <b>Fig. S23</b> $E_T(30)$ plot of the dye <b>4e</b> .                                                                                                     | <b>S15</b> |
| <b>Fig. S24</b> Cyclic voltammograms of the carbazole aldehyde derivatives ( <b>2</b> and <b>3a-3e</b> ) recorded in dichloromethane solutions.           | <b>S15</b> |
| <b>Fig. S25</b> Cyclic voltammograms of the dyes <b>4a-4e</b> recorded in dichloromethane solutions.                                                      | <b>S16</b> |
| <b>Table S1</b> Absorption properties of the dyes recorded in different solvents                                                                          | <b>S17</b> |
| <b>Table S2</b> Emission properties of the dyes recorded in different solvents                                                                            | <b>S17</b> |
| <b>Fig. S26</b> $^1\text{H}$ NMR spectrum of <b>2</b> recorded in $\text{CDCl}_3$ .                                                                       | <b>S18</b> |
| <b>Fig. S27</b> $^{13}\text{C}$ NMR spectrum of <b>2</b> recorded in $\text{CDCl}_3$ .                                                                    | <b>S18</b> |
| <b>Fig. S28</b> $^1\text{H}$ NMR spectrum of <b>3a</b> recorded in $\text{CDCl}_3$ .                                                                      | <b>S19</b> |
| <b>Fig. S29</b> $^{13}\text{C}$ NMR spectrum of <b>3a</b> recorded in $\text{CDCl}_3$ .                                                                   | <b>S19</b> |
| <b>Fig. S30</b> $^1\text{H}$ NMR spectrum of <b>3b</b> recorded in $\text{CDCl}_3$ .                                                                      | <b>S20</b> |
| <b>Fig. S31</b> $^{13}\text{C}$ NMR spectrum of <b>3b</b> recorded in $\text{CDCl}_3$ .                                                                   | <b>S20</b> |

|                                                                                           |            |
|-------------------------------------------------------------------------------------------|------------|
| <b>Fig. S32</b> $^1\text{H}$ NMR spectrum of <b>3c</b> recorded in $\text{CDCl}_3$ .      | <b>S21</b> |
| <b>Fig. S33</b> $^{13}\text{C}$ NMR spectrum of <b>3c</b> recorded in $\text{CDCl}_3$ .   | <b>S21</b> |
| <b>Fig. S34</b> $^1\text{H}$ NMR spectrum of <b>3d</b> recorded in $\text{CDCl}_3$ .      | <b>S22</b> |
| <b>Fig. S35</b> $^{13}\text{C}$ NMR spectrum of <b>3d</b> recorded in $\text{CDCl}_3$ .   | <b>S22</b> |
| <b>Fig. S36</b> $^1\text{H}$ NMR spectrum of <b>3e</b> recorded in $\text{CDCl}_3$ .      | <b>S23</b> |
| <b>Fig. S37</b> $^{13}\text{C}$ NMR spectrum of <b>3e</b> recorded in $\text{CDCl}_3$ .   | <b>S23</b> |
| <b>Fig. S38</b> $^1\text{H}$ NMR spectrum of <b>4a</b> recorded in $\text{DMSO-}d_6$ .    | <b>S24</b> |
| <b>Fig. S39</b> $^{13}\text{C}$ NMR spectrum of <b>4a</b> recorded in $\text{DMSO-}d_6$ . | <b>S24</b> |
| <b>Fig. S40</b> $^1\text{H}$ NMR spectrum of <b>4b</b> recorded in $\text{DMSO-}d_6$ .    | <b>S25</b> |
| <b>Fig. S41</b> $^{13}\text{C}$ NMR spectrum of <b>4b</b> recorded in $\text{DMSO-}d_6$ . | <b>S25</b> |
| <b>Fig. S42</b> $^1\text{H}$ NMR spectrum of <b>4c</b> recorded in $\text{DMSO-}d_6$ .    | <b>S26</b> |
| <b>Fig. S43</b> $^{13}\text{C}$ NMR spectrum of <b>4c</b> recorded in $\text{DMSO-}d_6$ . | <b>S26</b> |
| <b>Fig. S44</b> $^1\text{H}$ NMR spectrum of <b>4d</b> recorded in $\text{DMSO-}d_6$ .    | <b>S27</b> |
| <b>Fig. S45</b> $^{13}\text{C}$ NMR spectrum of <b>4d</b> recorded in $\text{DMSO-}d_6$ . | <b>S27</b> |
| <b>Fig. S46</b> $^1\text{H}$ NMR spectrum of <b>4e</b> recorded in $\text{DMSO-}d_6$ .    | <b>S28</b> |
| <b>Fig. S47</b> $^{13}\text{C}$ NMR spectrum of <b>4e</b> recorded in $\text{DMSO-}d_6$ . | <b>S28</b> |
| <b>Table S3</b> Cartesian coordinates for the optimized geometry of <b>4a</b>             | <b>S29</b> |
| <b>Table S4</b> Cartesian coordinates for the optimized geometry of <b>4b</b>             | <b>S31</b> |
| <b>Table S5</b> Cartesian coordinates for the optimized geometry of <b>4c</b>             | <b>S33</b> |
| <b>Table S6</b> Cartesian coordinates for the optimized geometry of <b>4d</b>             | <b>S35</b> |
| <b>Table S7</b> Cartesian coordinates for the optimized geometry of <b>4e</b>             | <b>S38</b> |

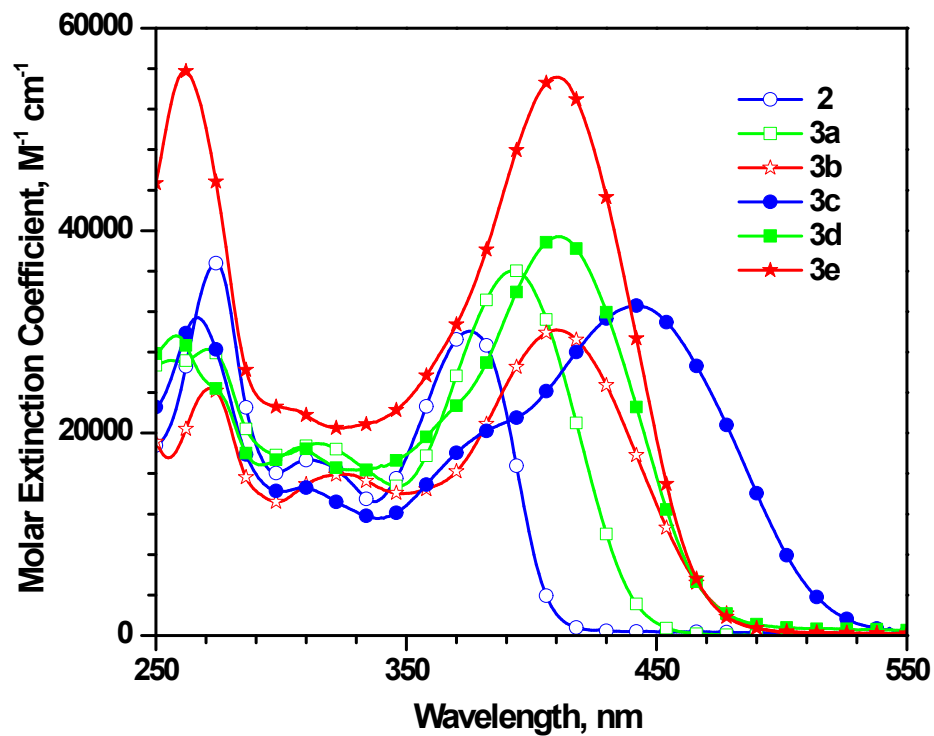

Fig. S1 Absorption spectra of precursor derivatives **2** and **3a-3e** recorded in dichloromethane solutions.

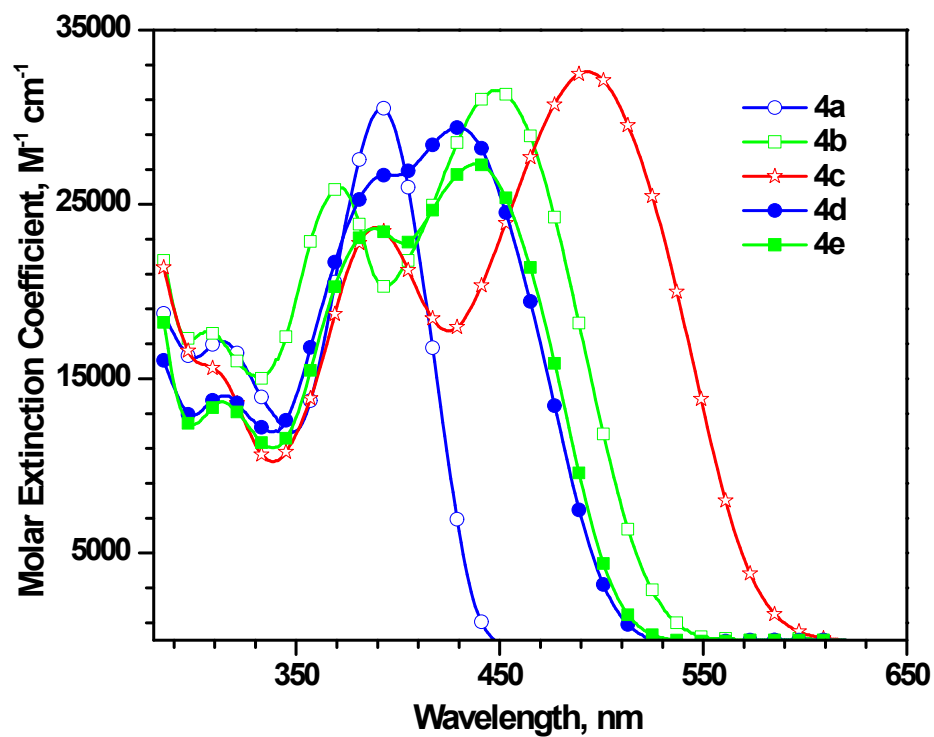

Fig. S2 Absorption spectra of the dyes (**4a-4e**) recorded in toluene solutions.

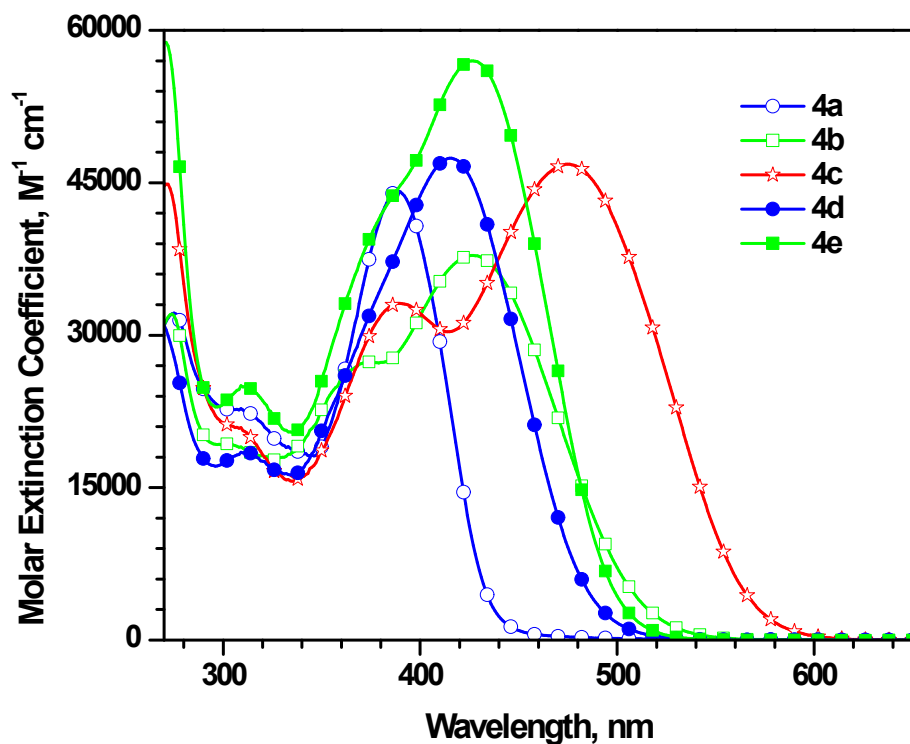

Fig. S3 Absorption spectra of the dyes (4a-4e) recorded in tetrahydrofuran solutions.

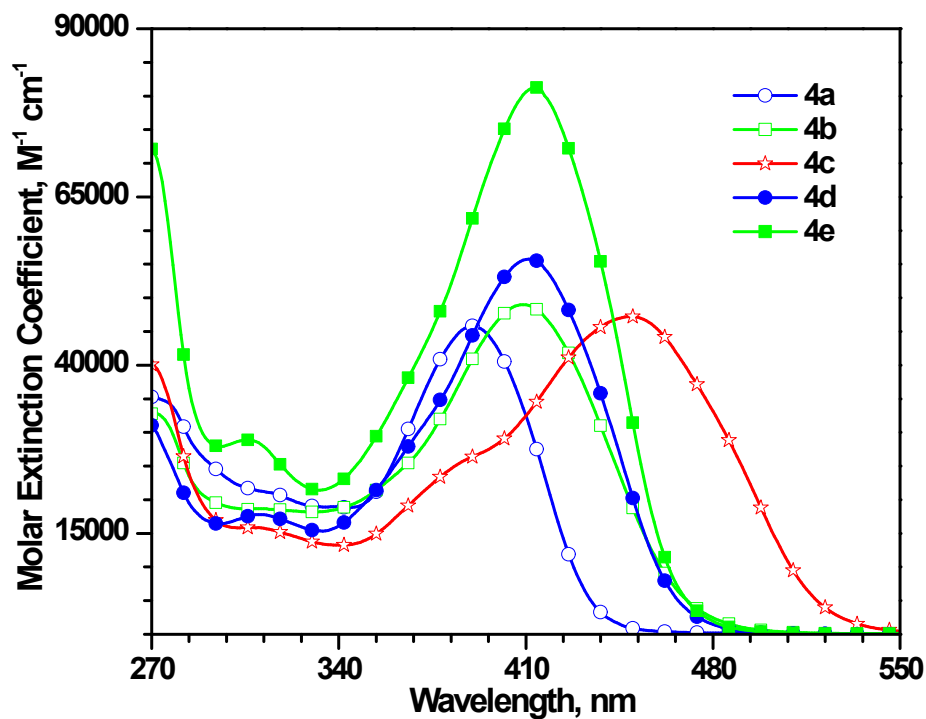

Fig. S4 Absorption spectra of the dyes (4a-4e) recorded in *N,N*-dimethyl formamide solutions.

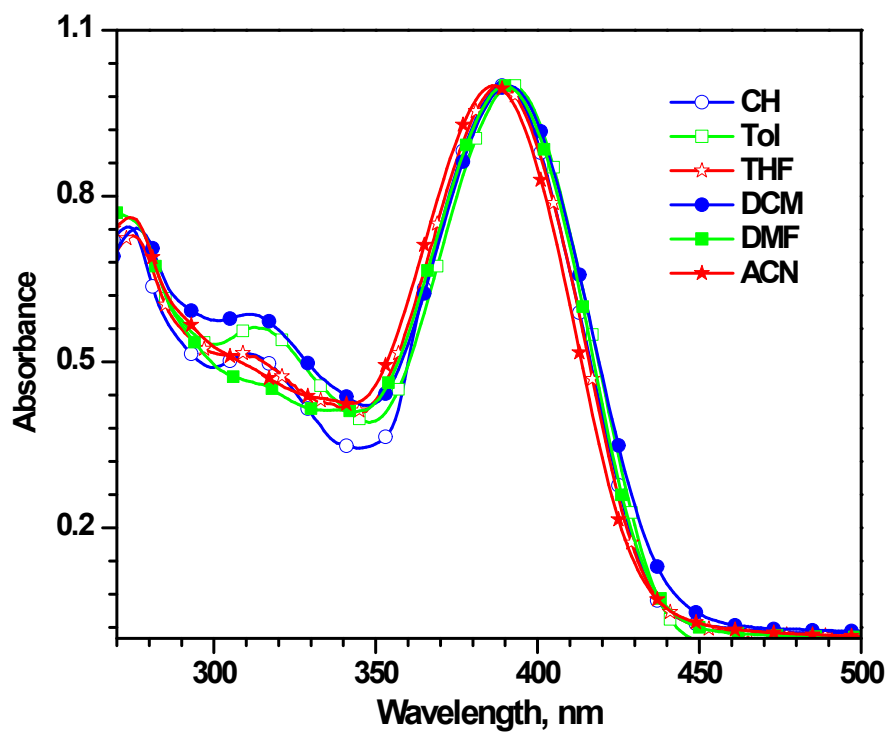

Fig. S5 Absorption spectra of the dye 4a recorded in different solvents.

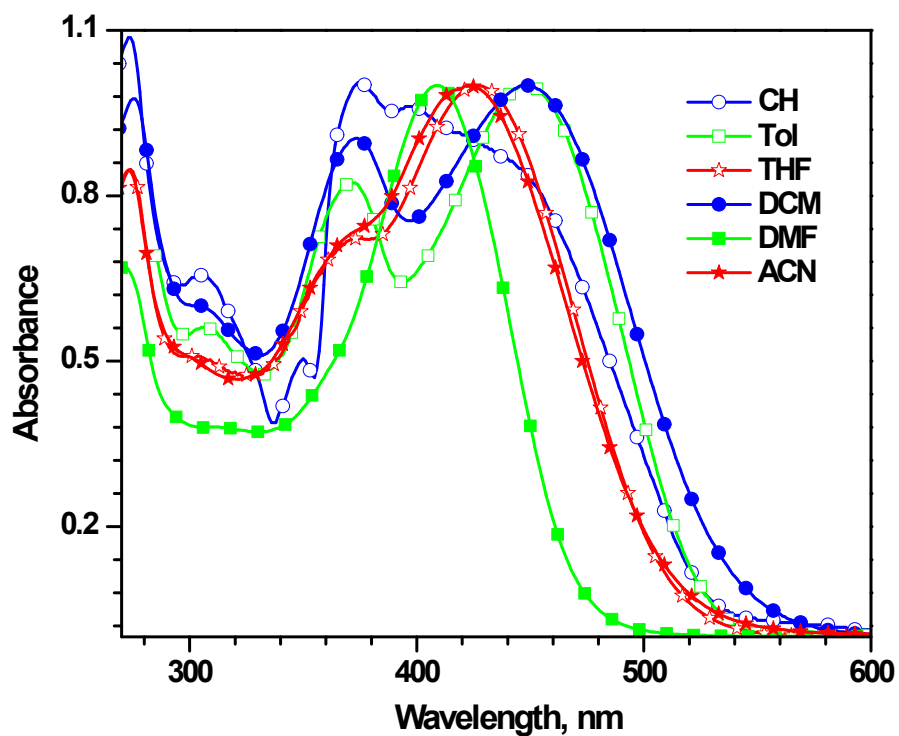

Fig. S6 Absorption spectra of the dye 4b recorded in different solvents.

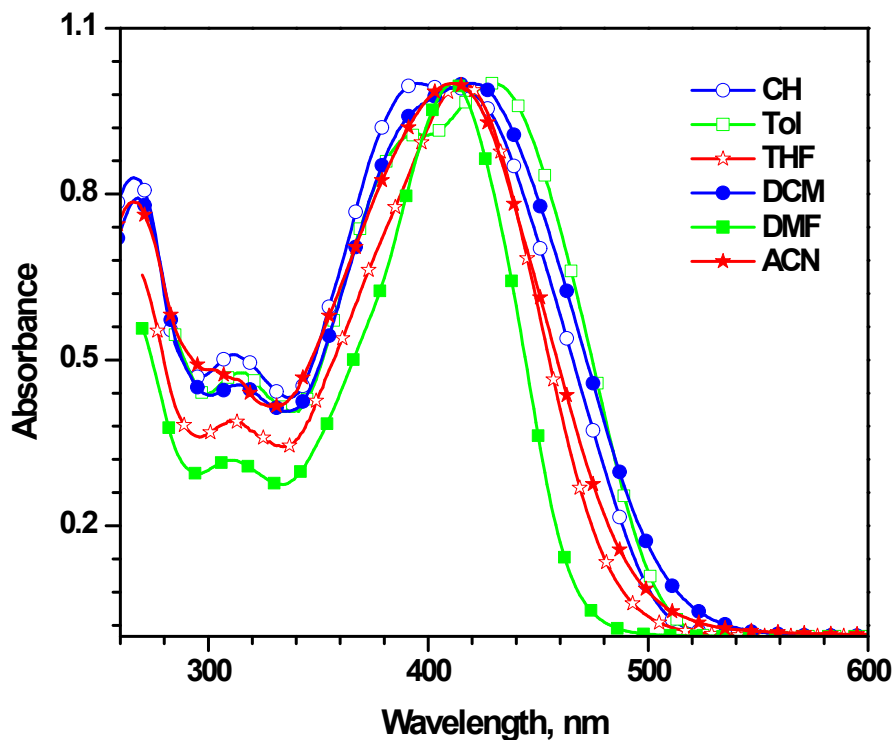

Fig. S7 Absorption spectra of the dye 4d recorded in different solvents.

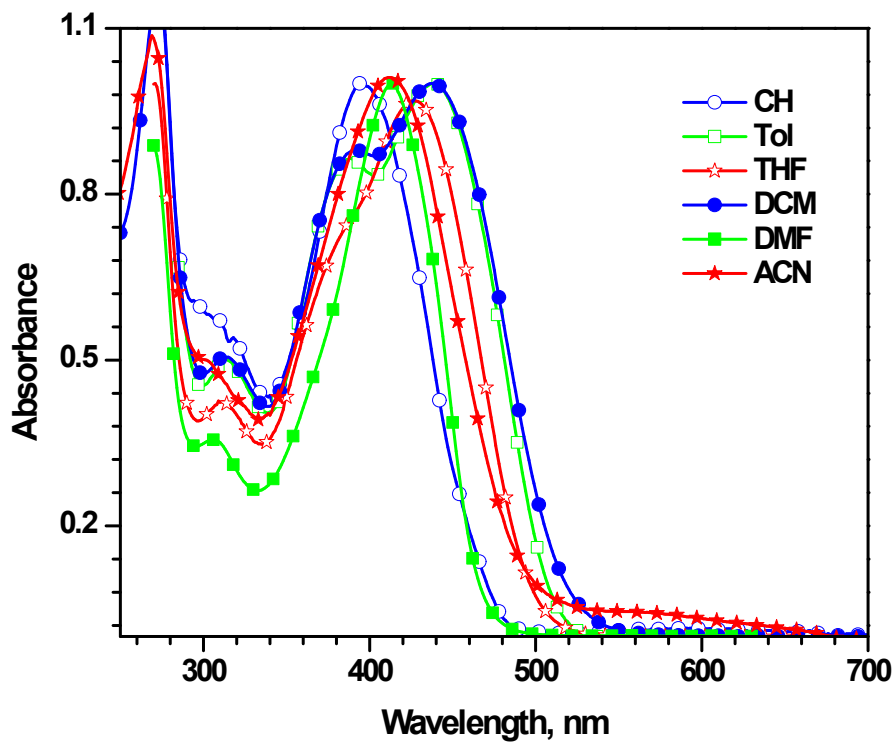

Fig. S8 Absorption spectra of the dye 4e recorded in different solvents.

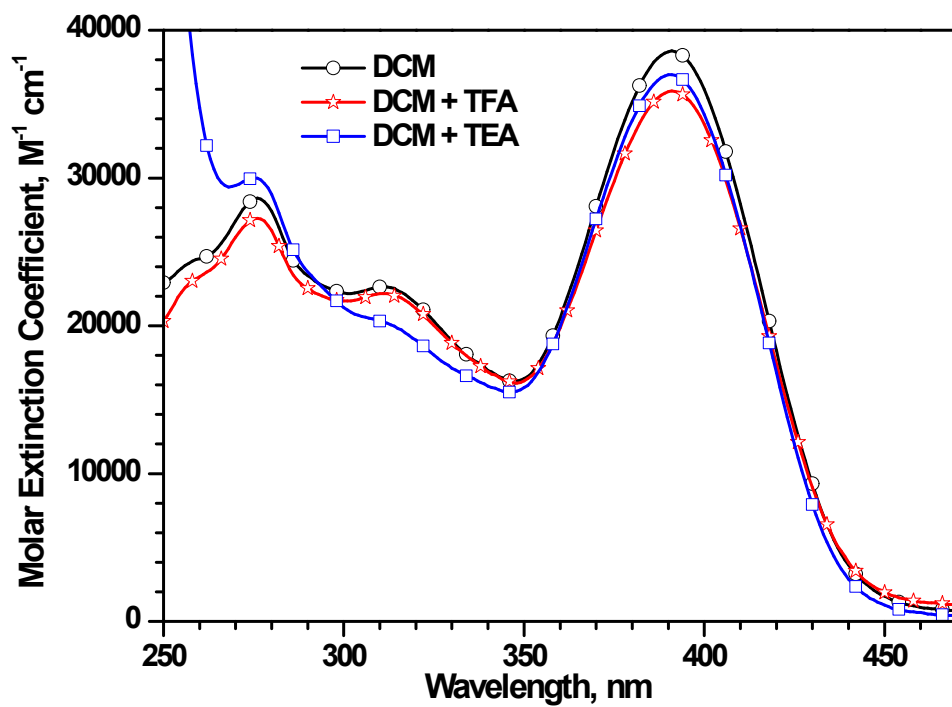

Fig. S9 Absorption spectra of the dye **4a** recorded in dichloromethane, after the addition of TFA and TEA.

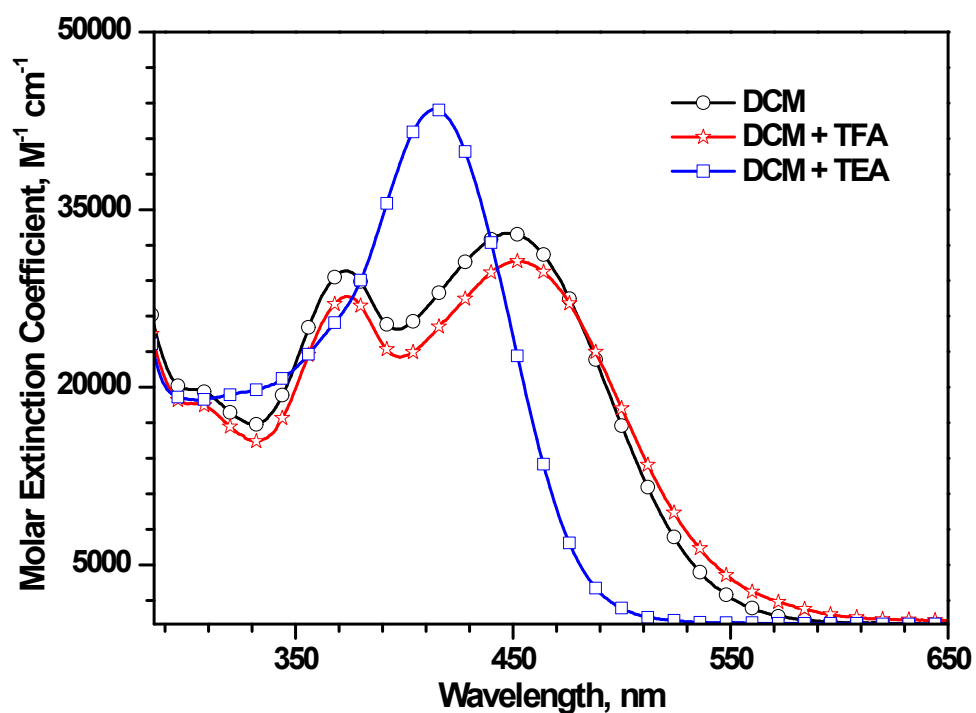

Fig. S10 Absorption spectra of the dye **4b** recorded in dichloromethane, after the addition of TFA and TEA.



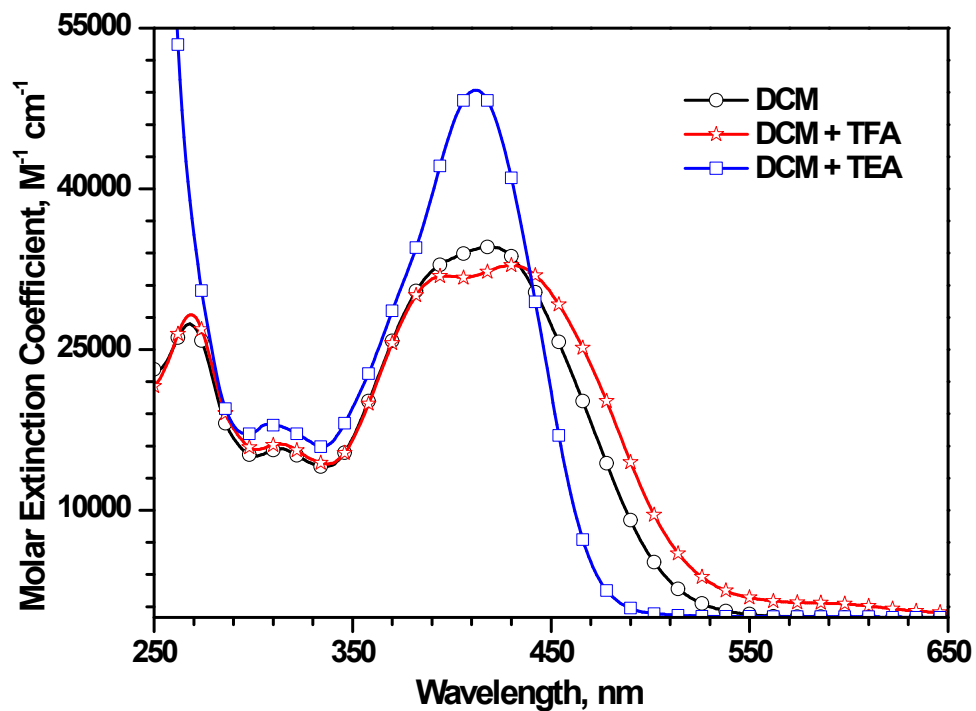

Fig. S11 Absorption spectra of the dye **4d** recorded in dichloromethane, after the addition of TFA and TEA.

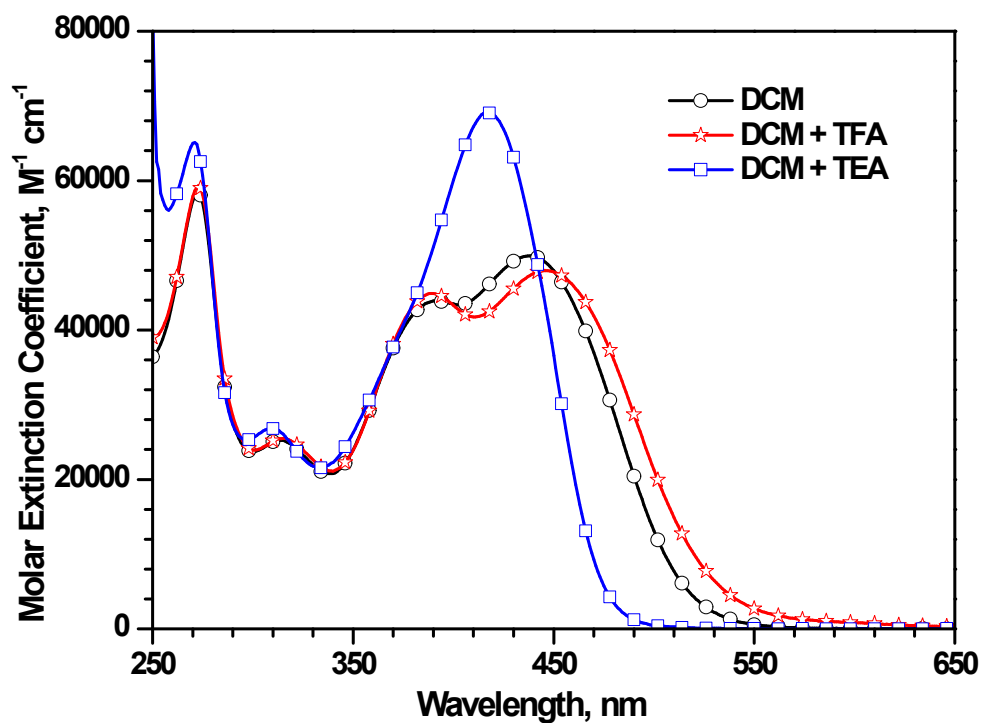

Fig. S12 Absorption spectra of the dye **4e** recorded in dichloromethane, after the addition of TFA and TEA.

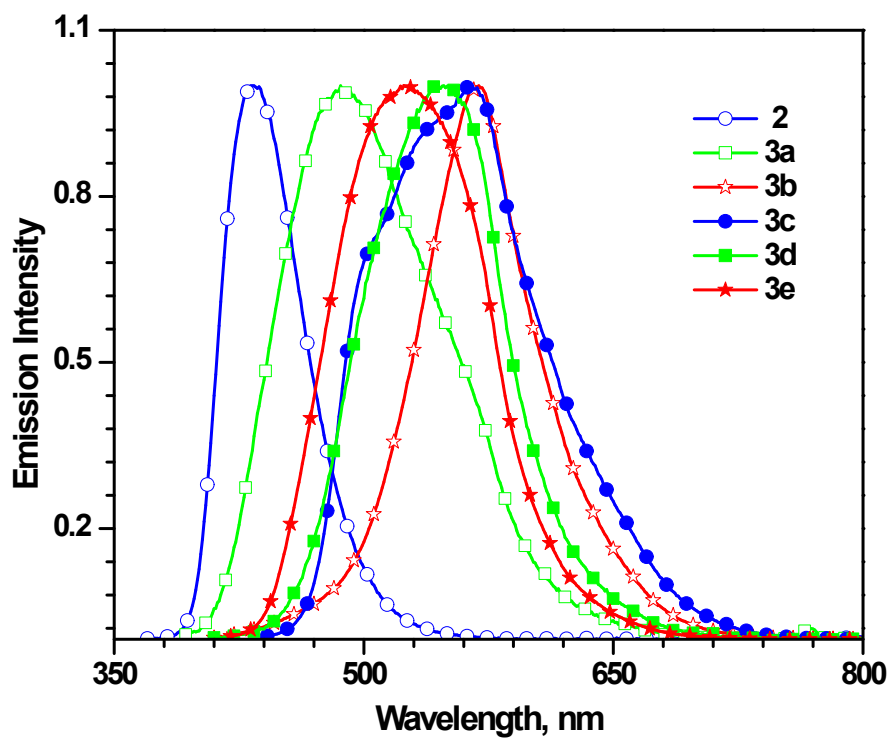

Fig. S13 Emission spectra of the carbazole precursor and aldehyde derivatives (2 and 3a-3e) recorded in dichloromethane solutions.

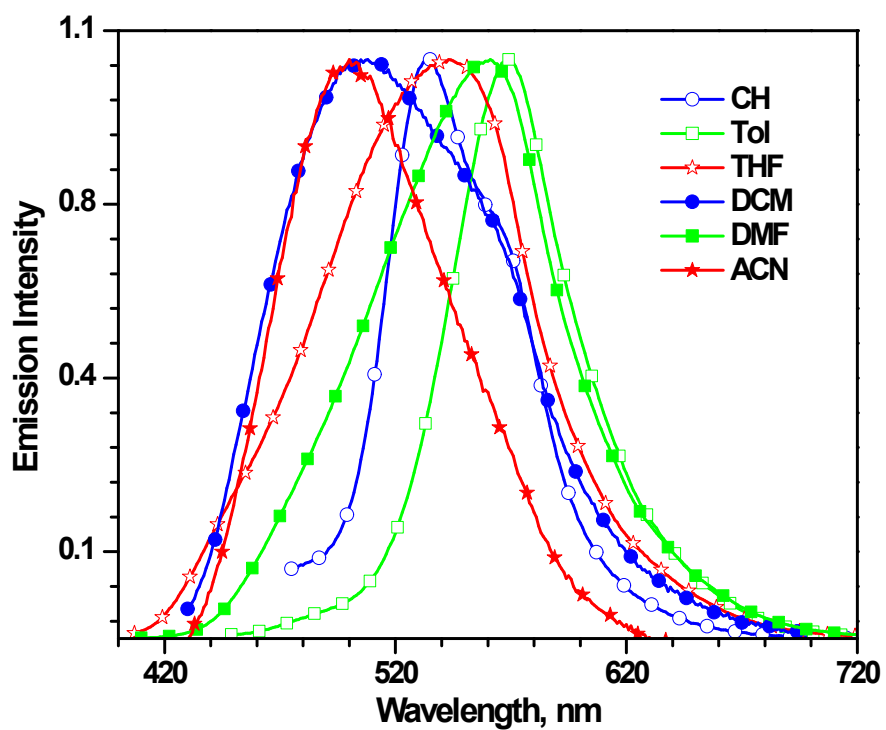

Fig. S14 Emission spectra of the dye (4b) recorded in different solvents.

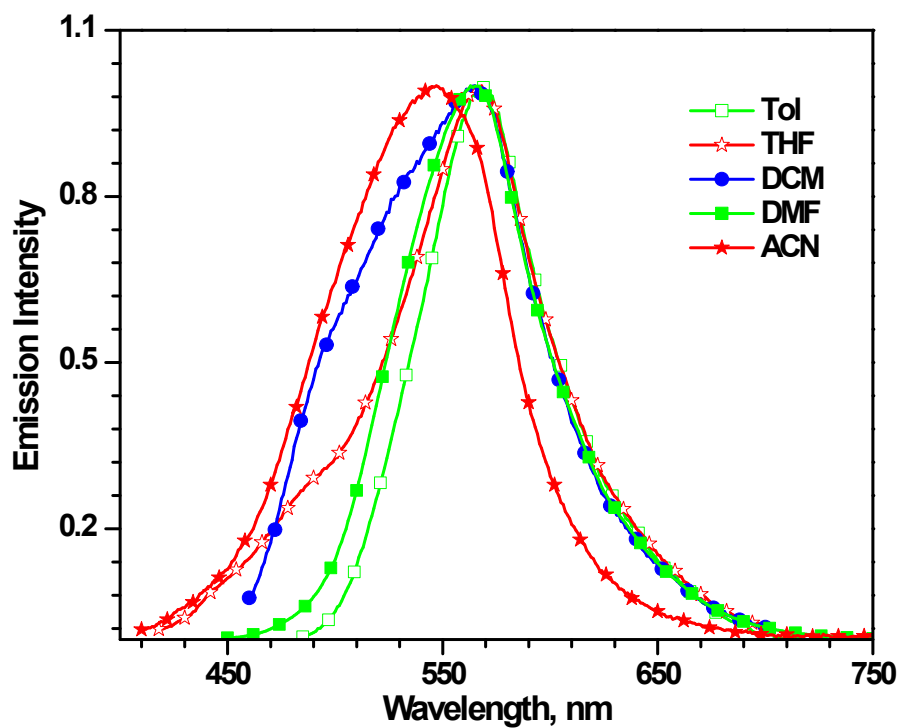

Fig. S15 Emission spectra of the dye (4c) recorded in different solvents.

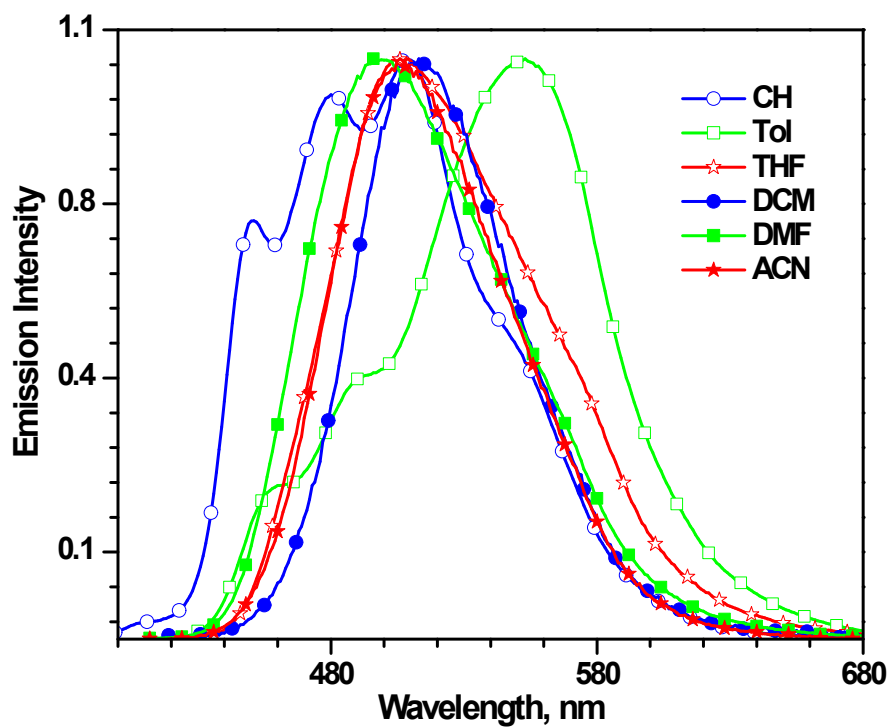

Fig. S16 Emission spectra of the dye (4d) recorded in different solvents.

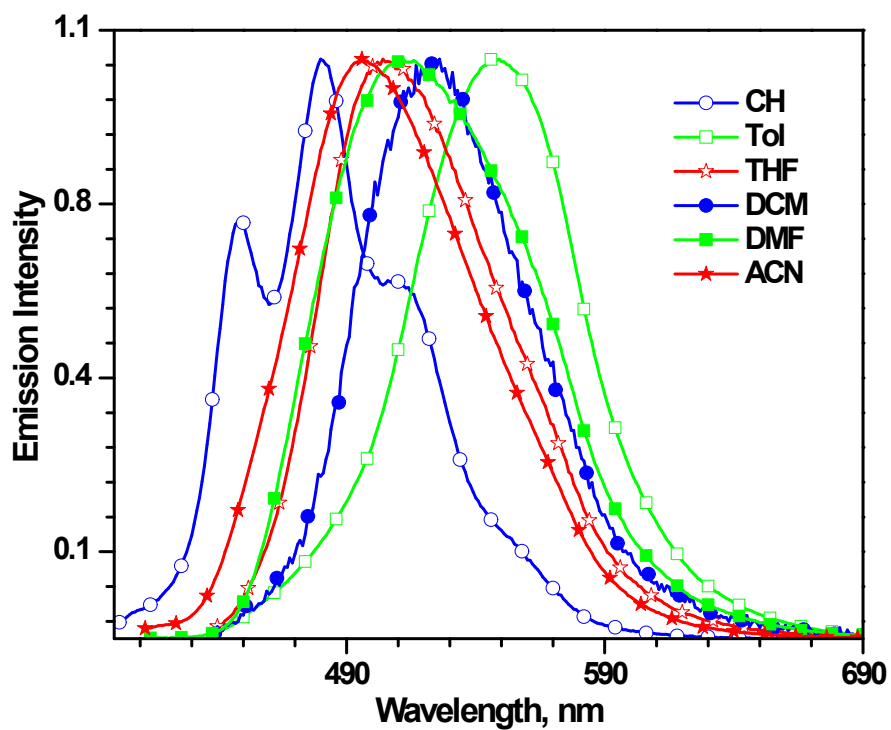

Fig. S17 Emission spectra of the dyes (4e) recorded in different solvents.

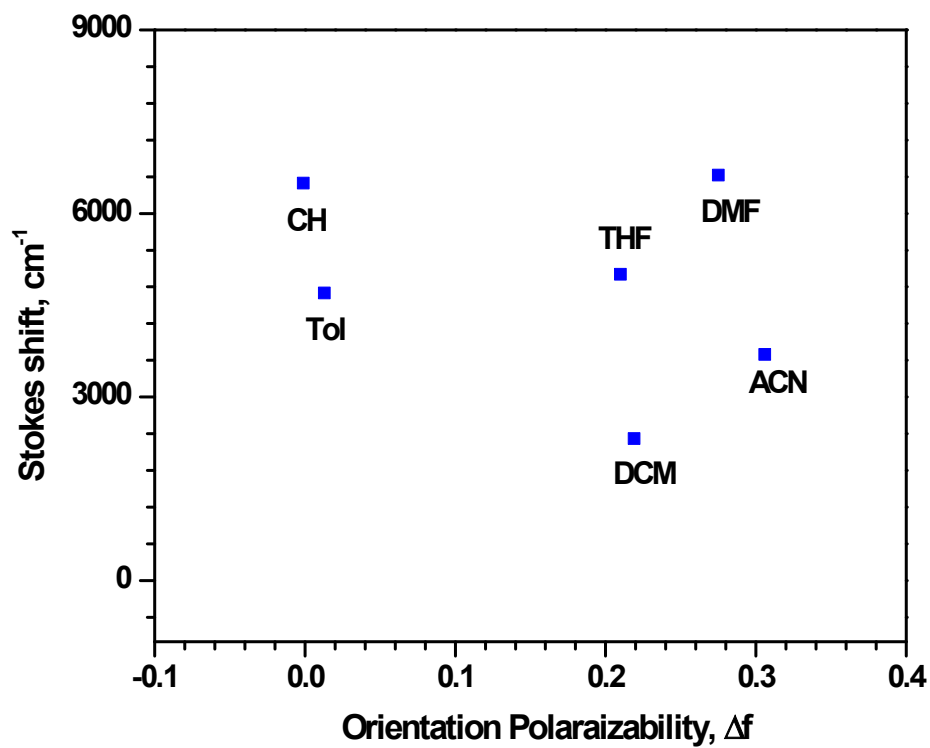

Fig. S18 Lippert-Mataga plot of the dye 4b.

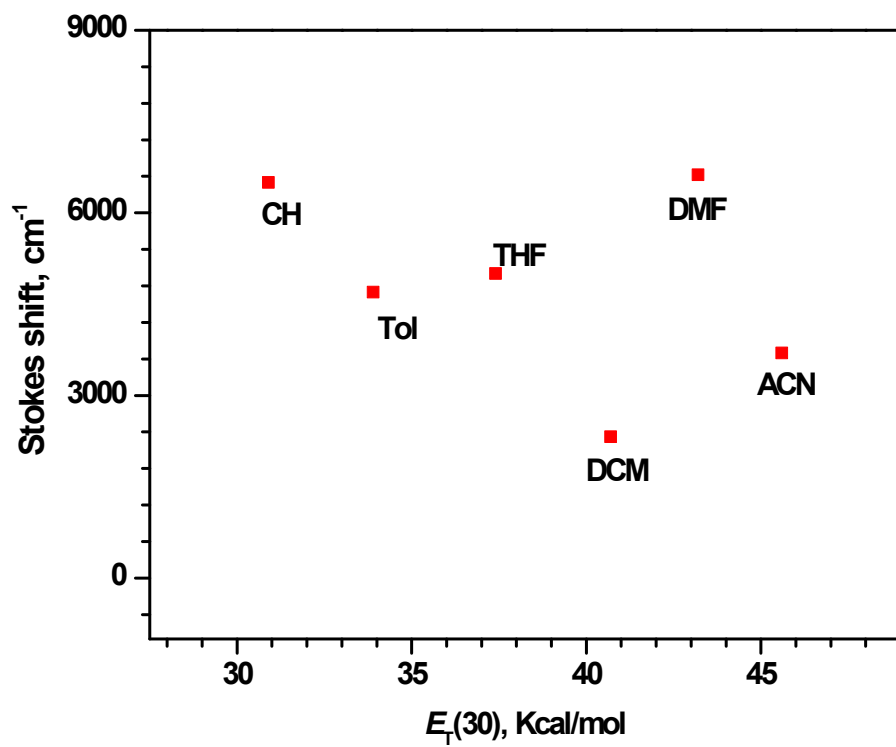

Fig. S19  $E_T(30)$  plot of the dye 4b.

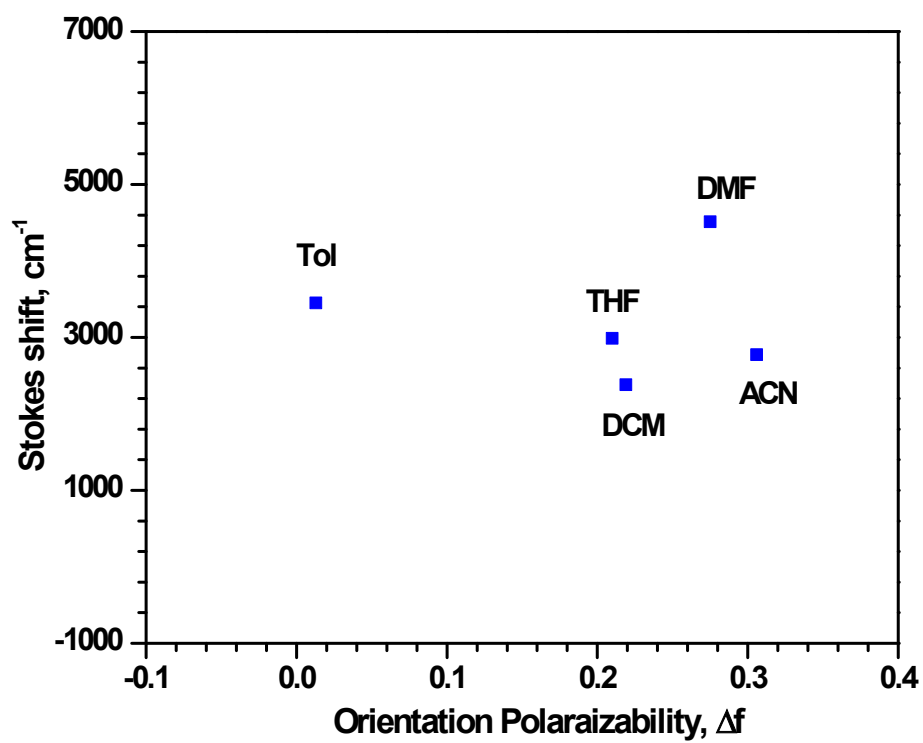

Fig. S20 Lippert-Mataga plot of the dye 4c.

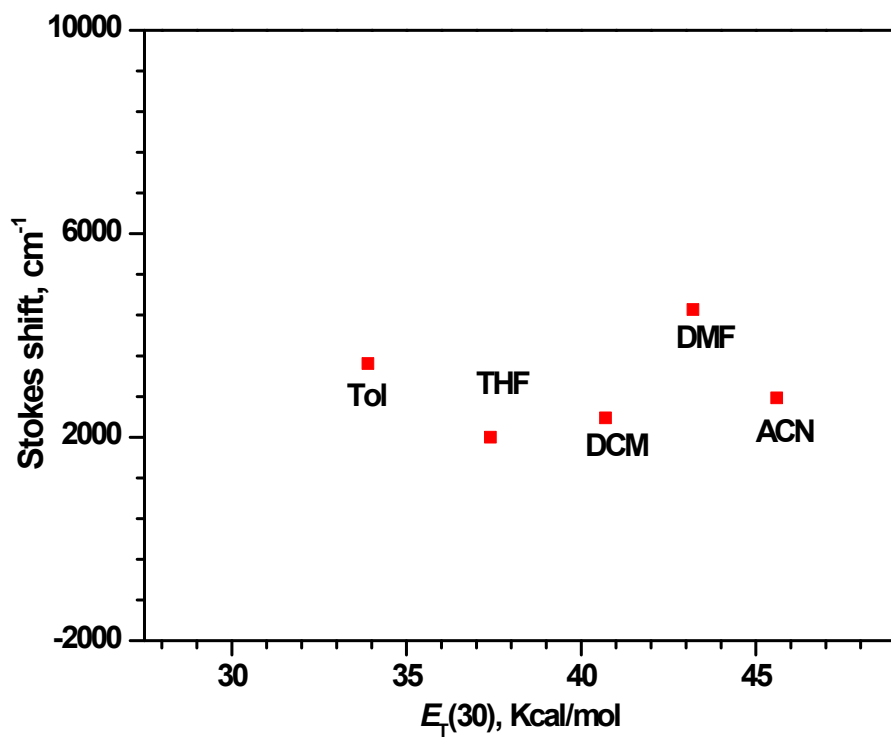

Fig. S21  $E_T(30)$  plot of the dye 4c.

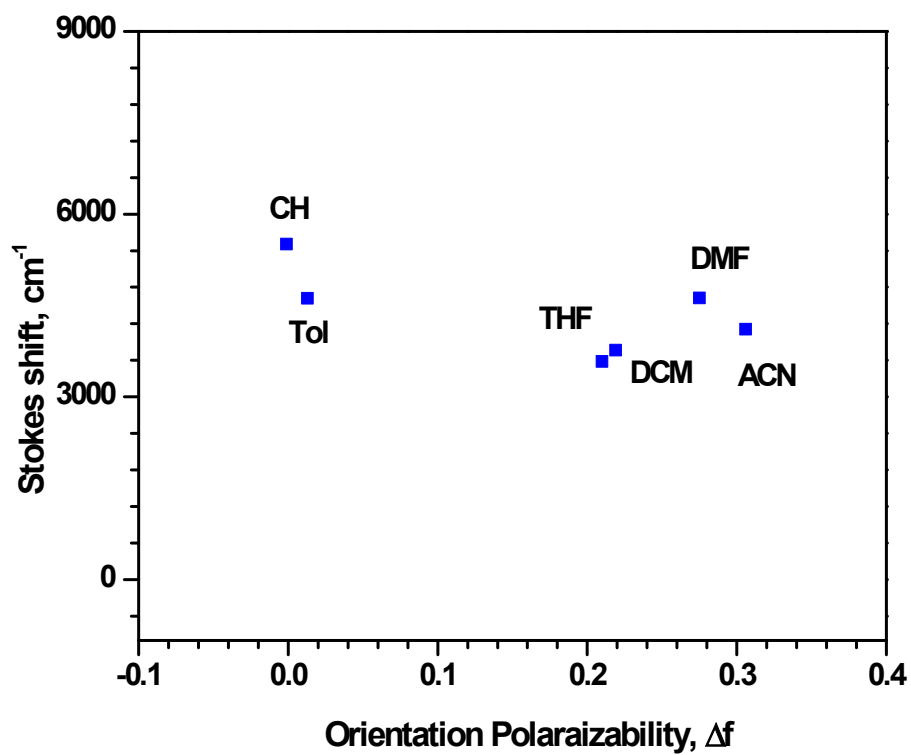

Fig. S22 Lippert-Mataga plot of the dye 4e.

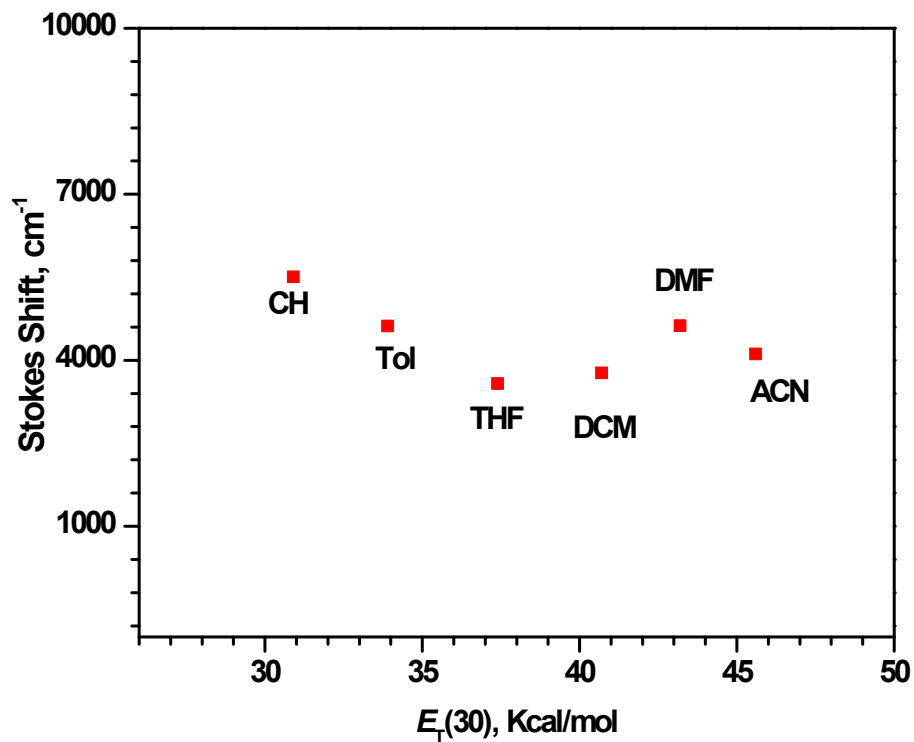

Fig. S23  $E_T(30)$  plot of the dye 4e.

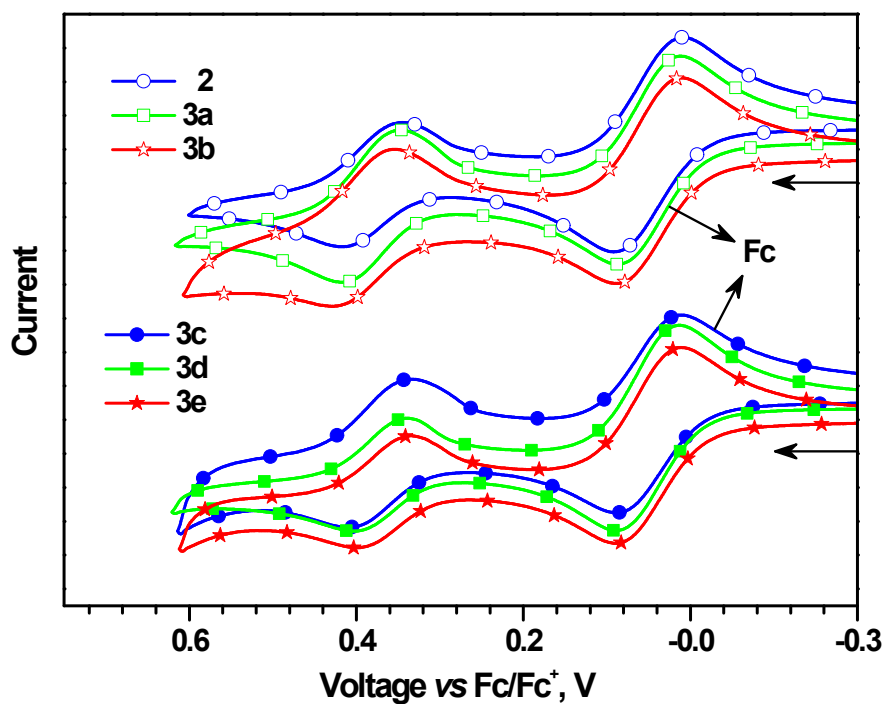

Fig. S24 Cyclic voltammograms of the carbazole aldehyde derivatives (2 and 3a-3e) recorded in dichloromethane solutions.

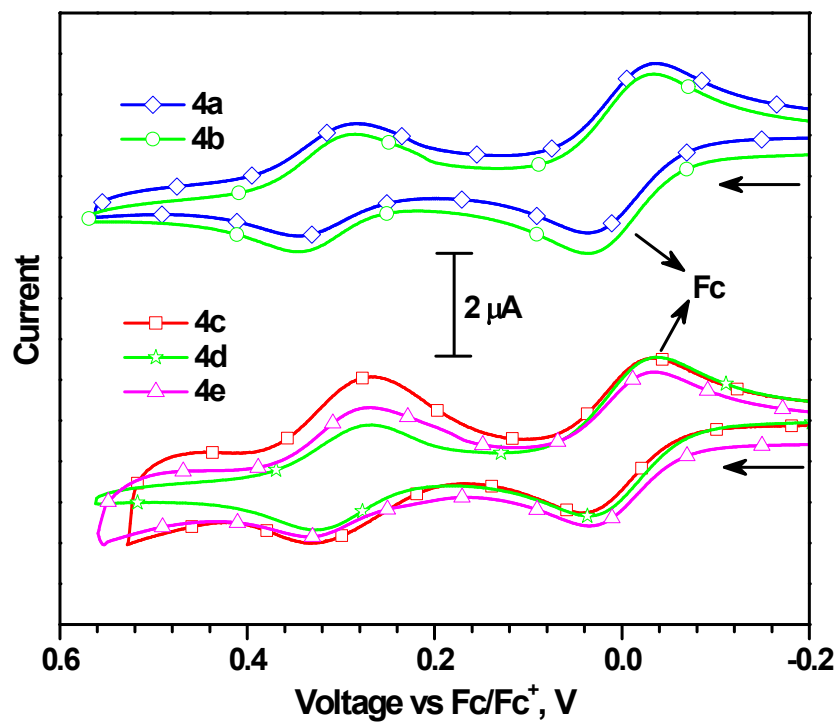

**Fig. S25** Cyclic voltammograms of the dyes (4a-4e) recorded in dichloromethane solutions.



**Table S1** Absorption properties of the dyes recorded in different solvents

| Dye       | $\lambda_{\text{abs}}$ , nm ( $\epsilon_{\text{max}} \times 10^3 \text{ M}^{-1} \text{ cm}^{-1}$ ) |                          |                                          |                                          |                                                         |                                          |                                          |                     |
|-----------|----------------------------------------------------------------------------------------------------|--------------------------|------------------------------------------|------------------------------------------|---------------------------------------------------------|------------------------------------------|------------------------------------------|---------------------|
|           | TiO <sub>2</sub> film                                                                              | CH                       | Tol                                      | THF                                      | DCM + TFA                                               | DCM + TEA                                | DMF                                      | ACN                 |
| <b>4a</b> | na                                                                                                 | 390,<br>311, 274         | 393 (30.5),<br>313 (17.1)                | 389 (44.2),<br>309 (22.8),<br>275 (32.2) | 391 (35.9),<br>313 (22.1),<br>276 (27.2)                | 391 (37.0),<br>276 (30.0)                | 390 (45.8)                               | 387,<br>274         |
| <b>4b</b> | 483                                                                                                | 397,<br>375,<br>350, 305 | 448 (31.5),<br>372 (26.0),<br>307 (17.8) | 427 (37.8),<br>368 (27.0)                | 452 (30.6),<br>374 (27.7),<br>276 (30.1)                | 414 (43.5),<br>275 (31.1)                | 409 (49.0)                               | 422,<br>368,<br>273 |
| <b>4c</b> | 525                                                                                                | ns                       | 493 (32.6),<br>389 (23.7),<br>312 (15.3) | 475 (46.8),<br>389 (33.1),<br>309 (20.9) | 505 (31.1),<br>391 (25.1)                               | 456 (35.8),<br>387 (21.1),<br>271 (30.9) | 449 (47.2),<br>386 (25.6),<br>310 (15.9) | 475,<br>389,<br>270 |
| <b>4d</b> | 464                                                                                                | 397,<br>351,<br>304, 267 | 430 (29.4),<br>396 (26.7),<br>315 (14.0) | 416 (47.4),<br>312 (18.5)                | 430 (32.9),<br>397 (31.9),<br>313 (16.2)                | 412 (49.2),<br>307 (18.0)                | 412 (55.7),<br>311 (17.7)                | 411,<br>303,<br>266 |
| <b>4e</b> | 470                                                                                                | 416,<br>402,<br>348, 305 | 438 (27.3),<br>388 (23.6),<br>314 (13.7) | 427 (57.0),<br>312 (25.0)                | 446 (47.9),<br>389 (44.9),<br>316 (25.5),<br>273 (59.3) | 417 (69.0),<br>309 (26.8),<br>271 (65.1) | 414 (81.2),<br>305 (28.9)                | 412,<br>303,<br>269 |

na = not soluble

**Table S2** Emission properties of the dyes recorded in different solvents

| Dye       | $\lambda_{\text{em}}$ , nm | Stoke shift, cm <sup>-1</sup> |     |     |     |      |      |      |      |      |
|-----------|----------------------------|-------------------------------|-----|-----|-----|------|------|------|------|------|
|           | CH                         | Tol                           | THF | DMF | ACN | CH   | Tol  | THF  | DMF  | ACN  |
| <b>4a</b> | 462, 438                   | 448                           | 469 | 485 | 491 | 2810 | 3123 | 4385 | 5022 | 5473 |
| <b>4b</b> | 535                        | 569                           | 543 | 561 | 500 | 6497 | 4697 | 5003 | 6625 | 3697 |
| <b>4c</b> | na                         | 594                           | 568 | 563 | 547 | na   | 3449 | 2986 | 4510 | 2771 |
| <b>4d</b> | 508, 480                   | 553                           | 509 | 496 | 506 | 5504 | 5172 | 4625 | 4111 | 4568 |
| <b>4e</b> | 509, 480                   | 549                           | 504 | 512 | 496 | 5229 | 4616 | 3578 | 4623 | 4111 |

na = not applicable

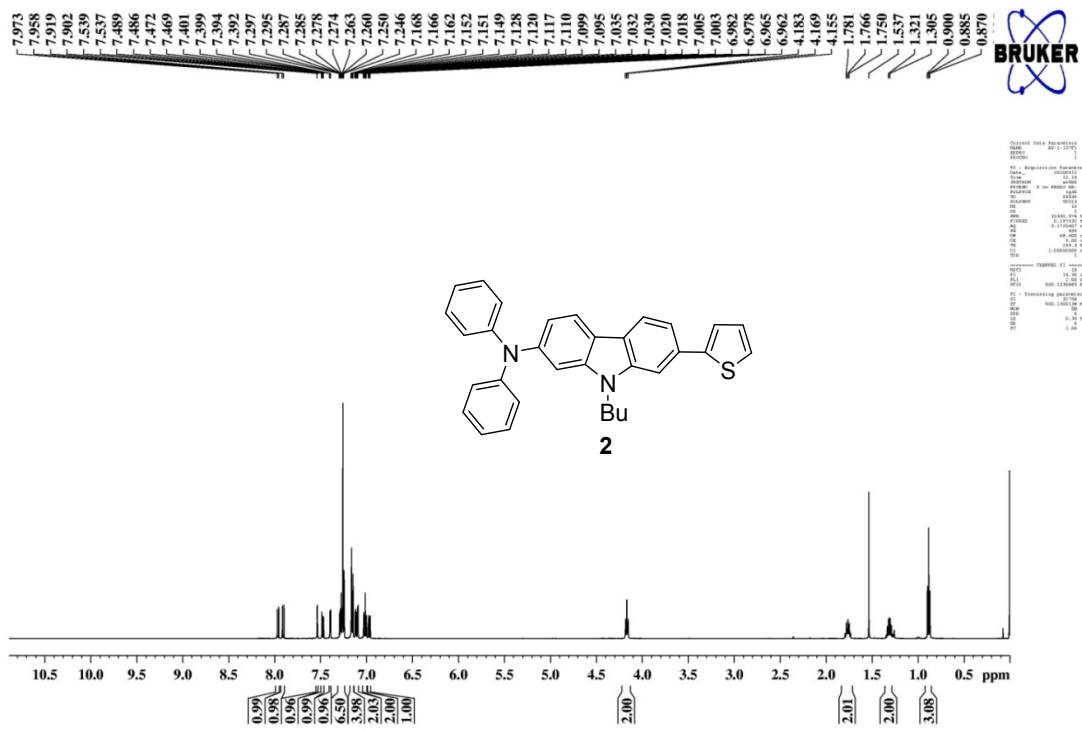

Fig. S26 <sup>1</sup>H NMR spectrum of **2** recorded in CDCl<sub>3</sub>.

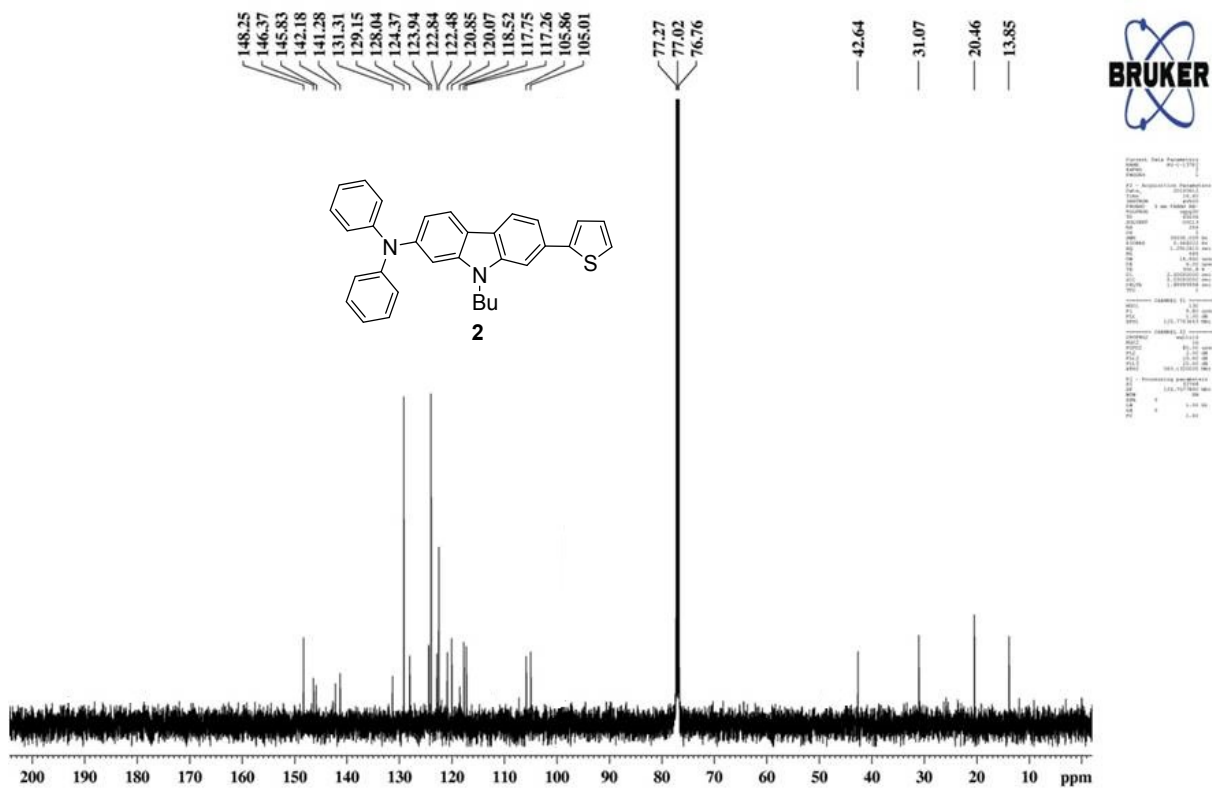

Fig. S27 <sup>13</sup>C NMR spectrum of **2** recorded in CDCl<sub>3</sub>.

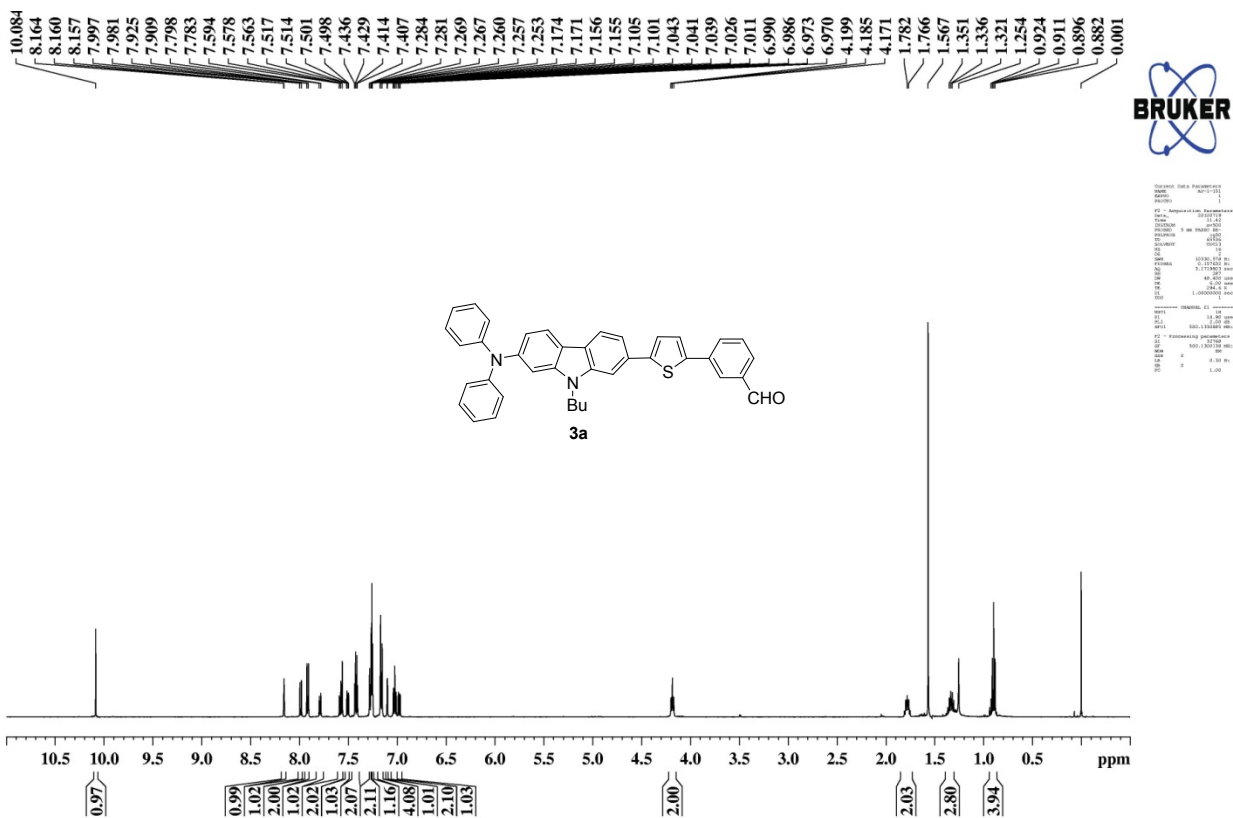

Fig. S28 <sup>1</sup>H NMR spectrum of **3a** recorded in CDCl<sub>3</sub>.

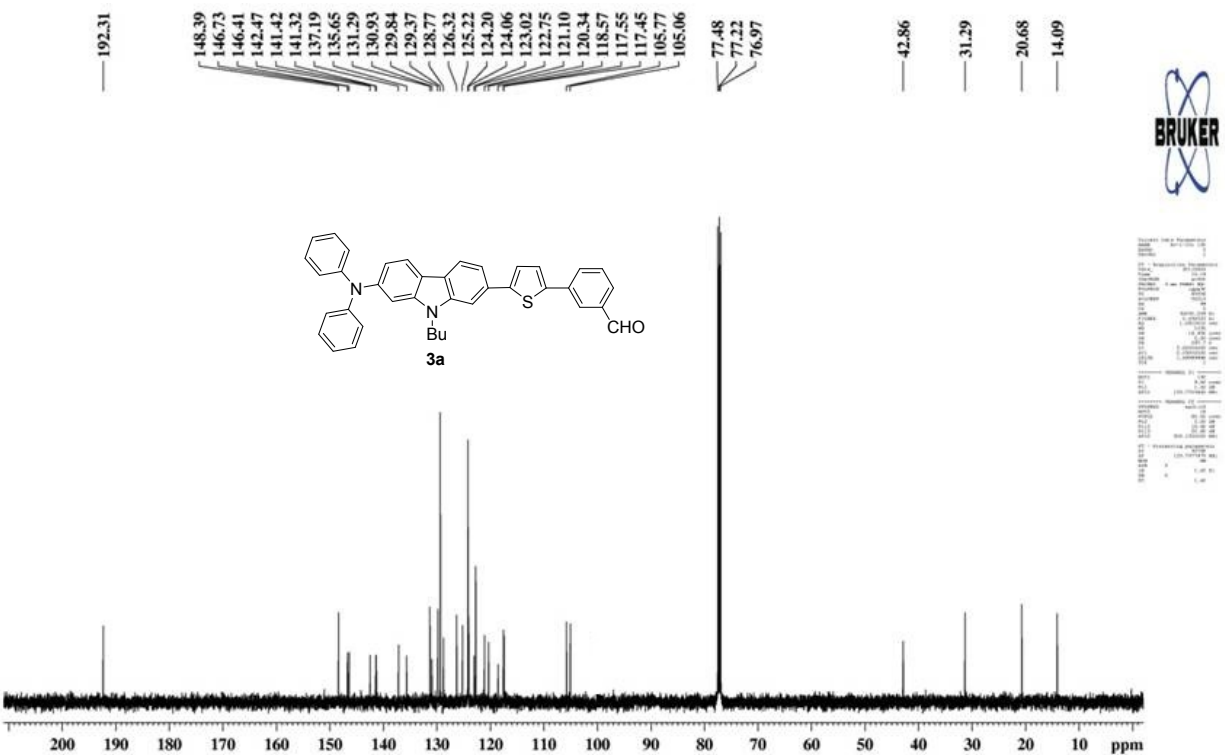

Fig. S29 <sup>13</sup>C NMR spectrum of **3a** recorded in CDCl<sub>3</sub>.

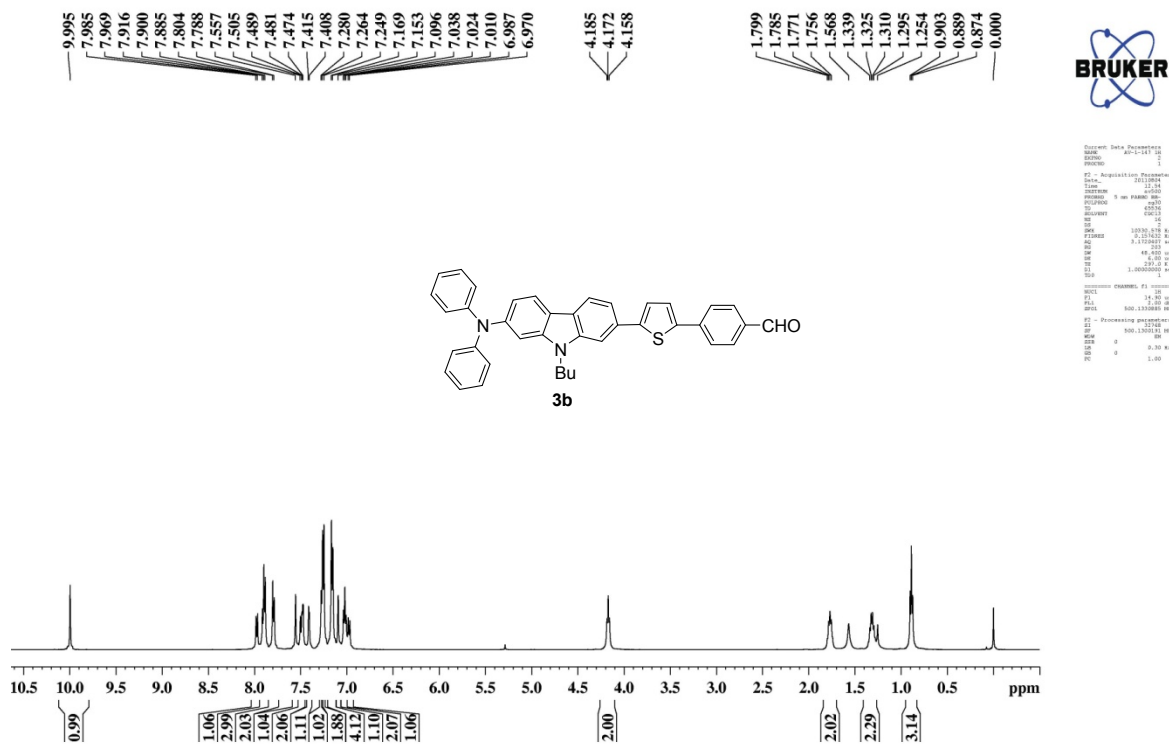

Fig. S30 <sup>1</sup>H NMR spectrum of **3b** recorded in CDCl<sub>3</sub>.

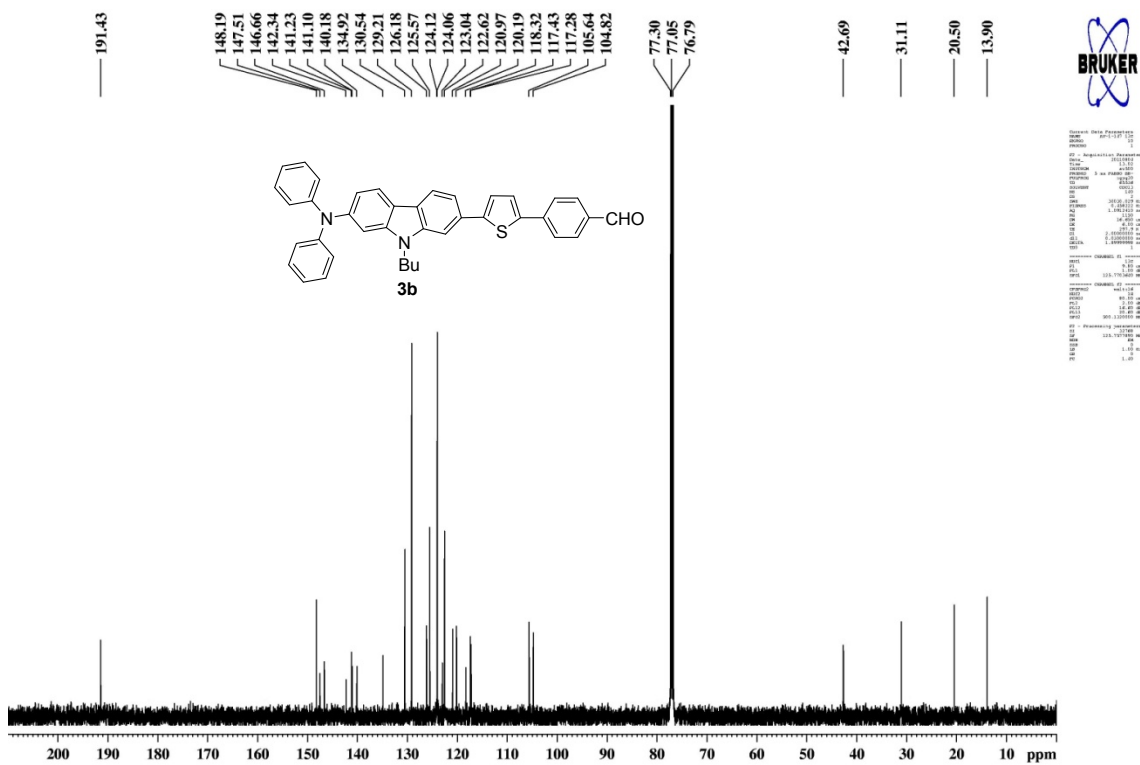

Fig. S31 <sup>13</sup>C NMR spectrum of **3b** recorded in CDCl<sub>3</sub>.

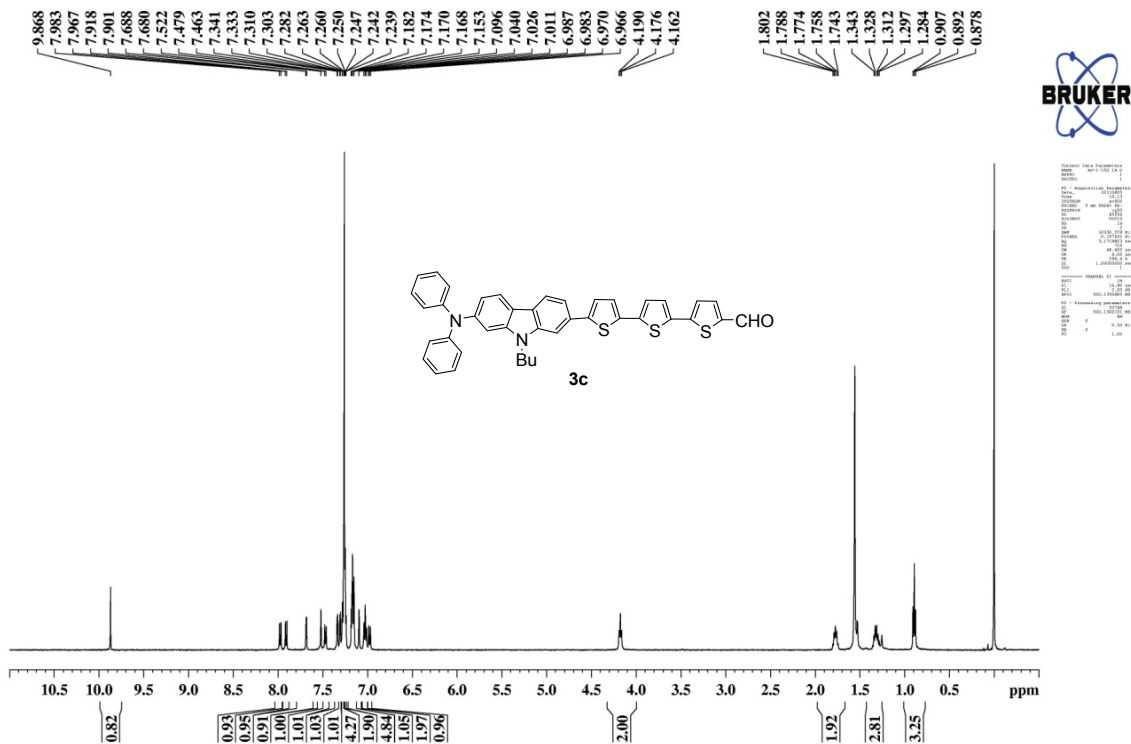

Fig. S32 <sup>1</sup>H NMR spectrum of **3c** recorded in CDCl<sub>3</sub>.

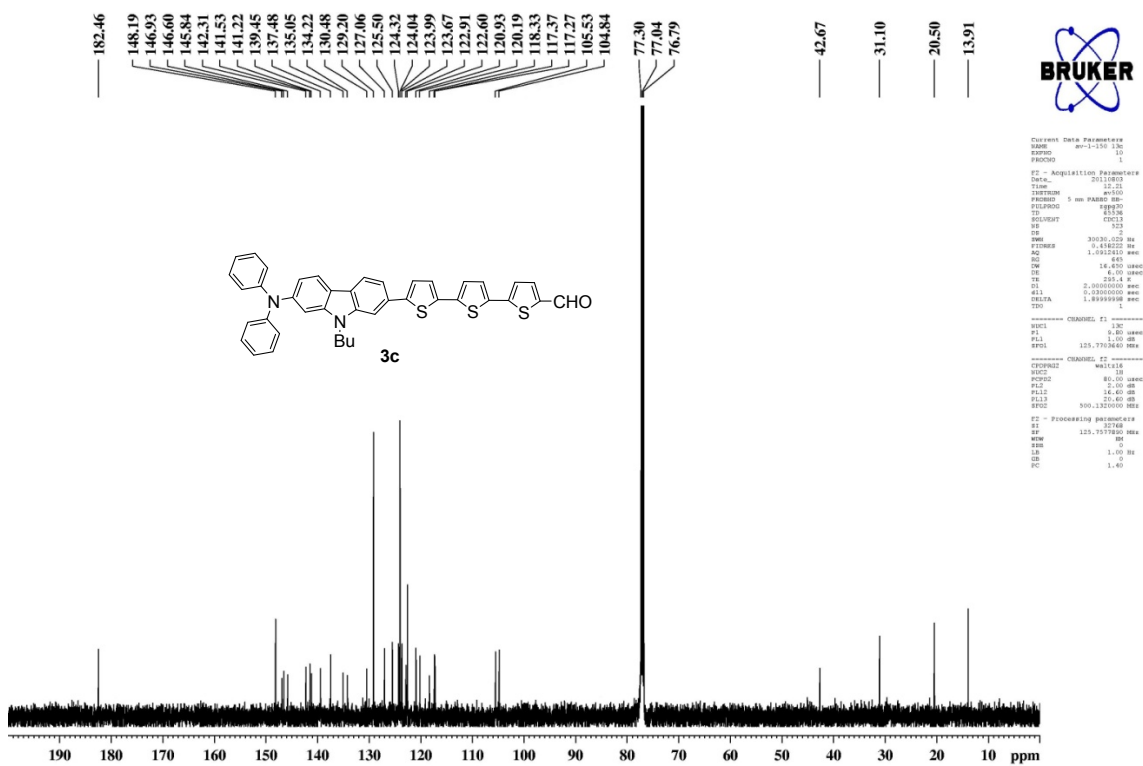

Fig. S33 <sup>13</sup>C NMR spectrum of **3c** recorded in CDCl<sub>3</sub>.

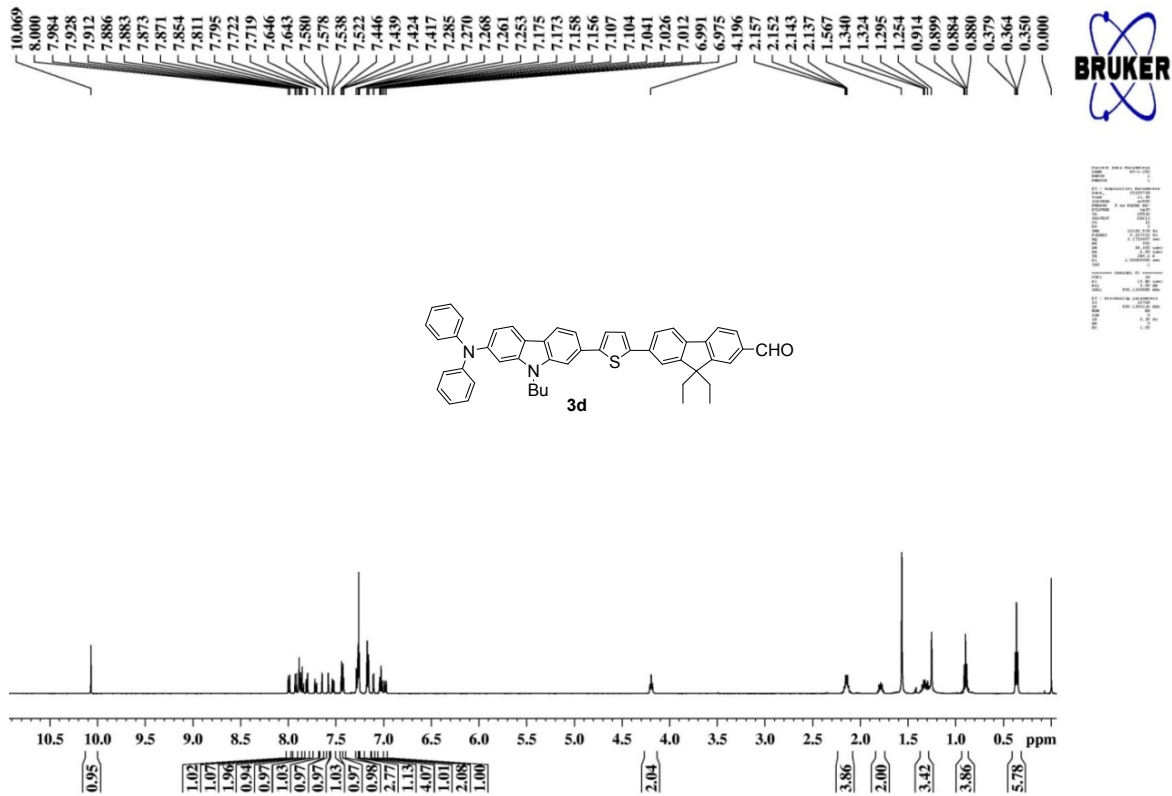

Fig. S34 <sup>1</sup>H NMR spectrum of **3d** recorded in CDCl<sub>3</sub>.

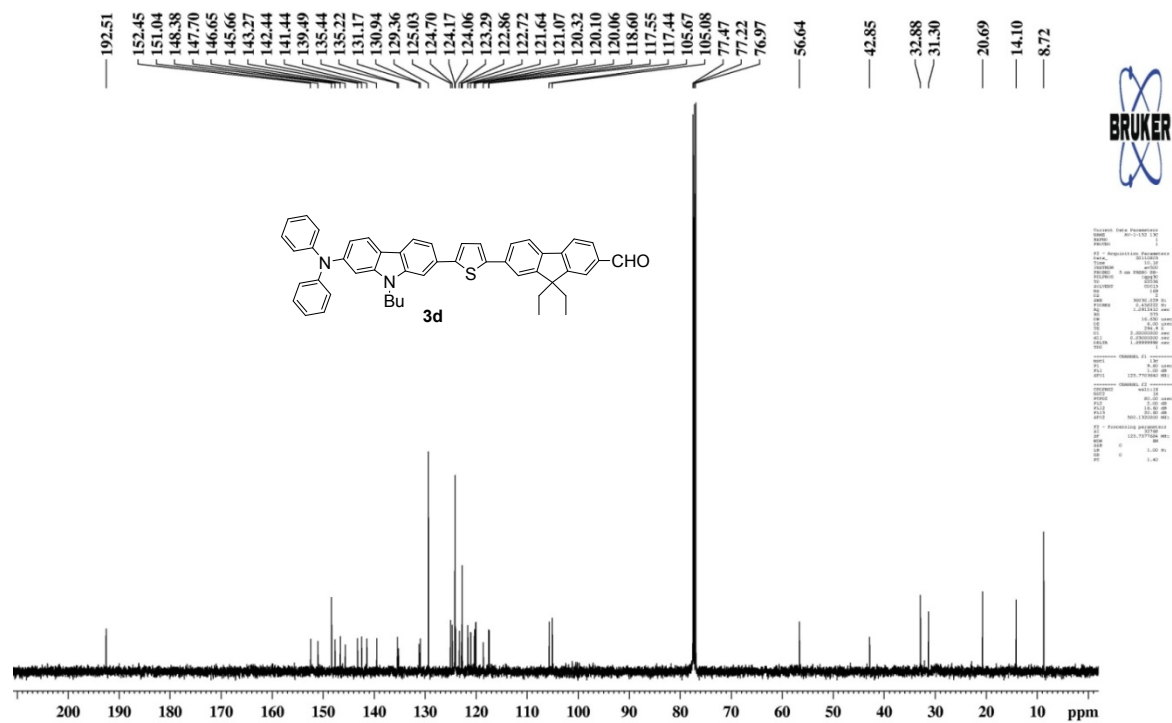

Fig. S35 <sup>13</sup>C NMR spectrum of **3d** recorded in CDCl<sub>3</sub>.

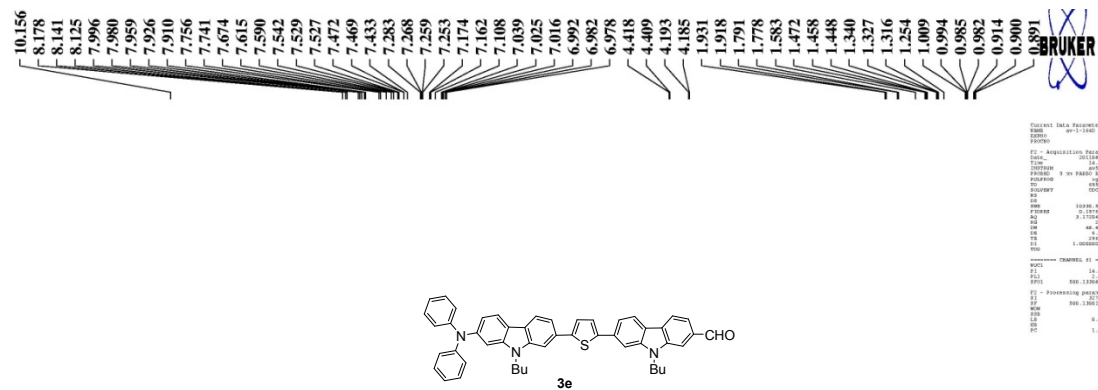

Fig. S36 <sup>1</sup>H NMR spectrum of **3e** recorded in CDCl<sub>3</sub>.

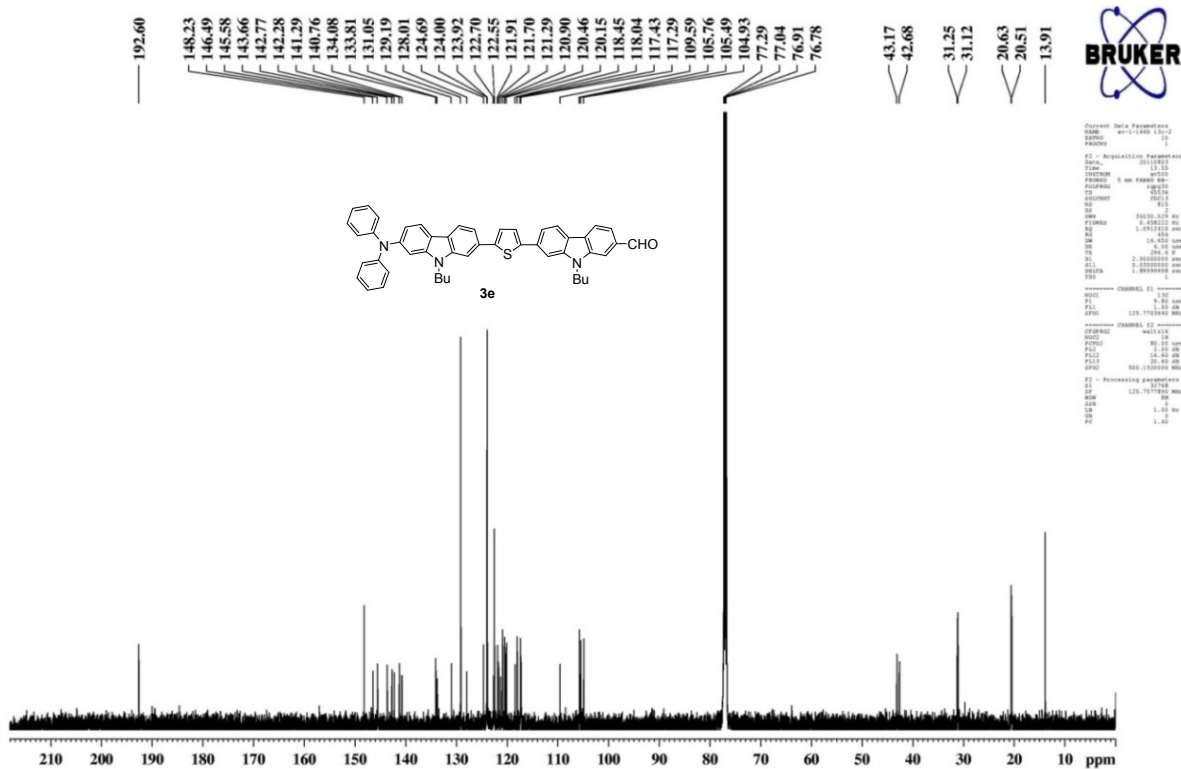

Fig. S37 <sup>13</sup>C NMR spectrum of **3e** recorded in CDCl<sub>3</sub>.

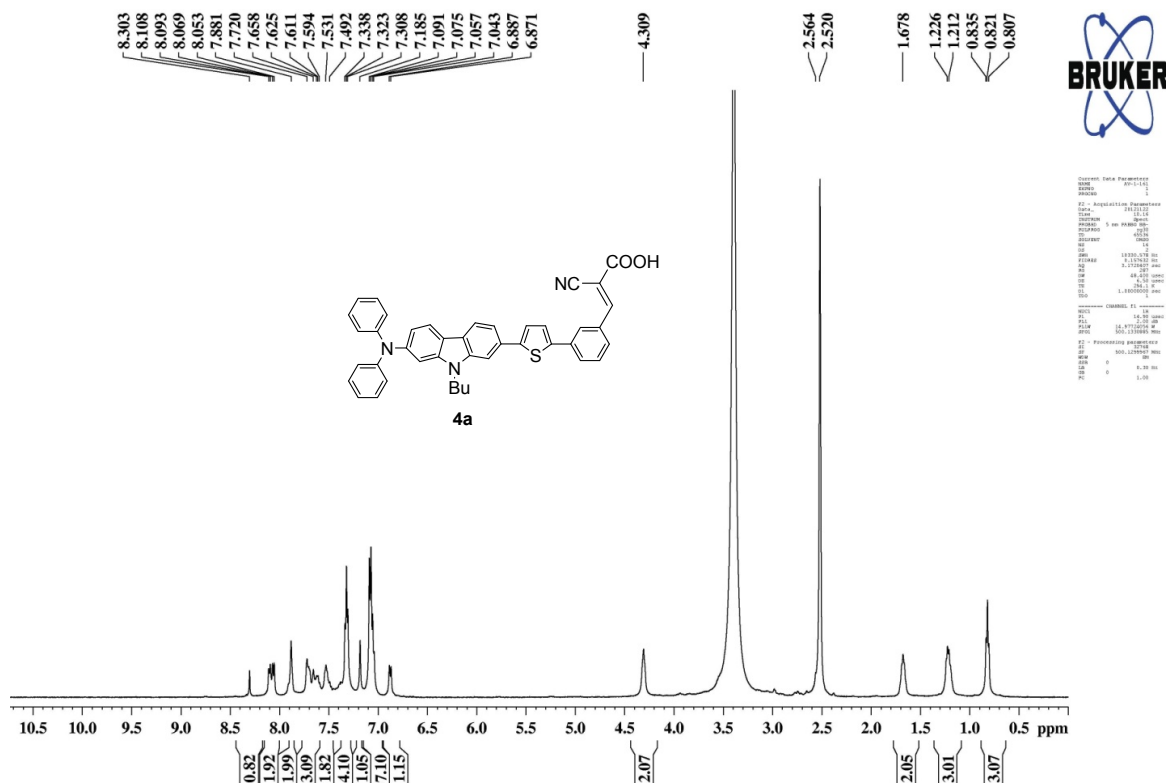

Fig. S38 <sup>1</sup>H NMR spectrum of **4a** recorded in DMSO-*d*<sub>6</sub>.

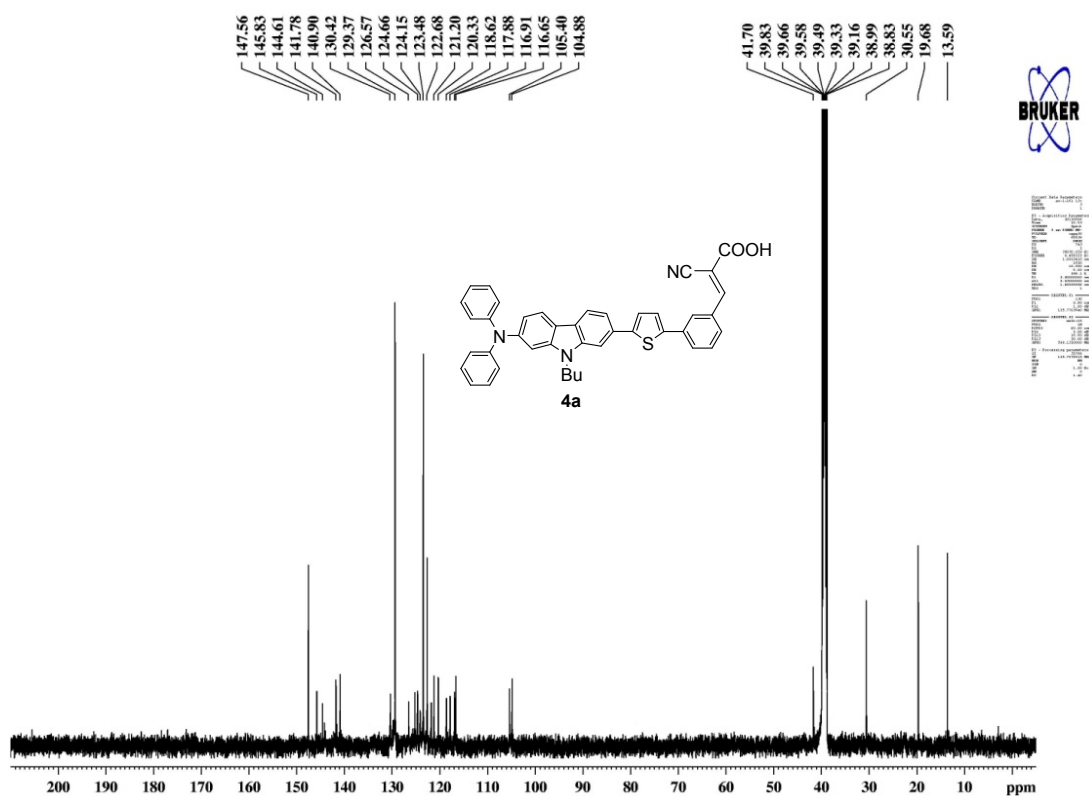

Fig. S39 <sup>13</sup>C NMR spectrum of **4a** recorded in DMSO-*d*<sub>6</sub>.



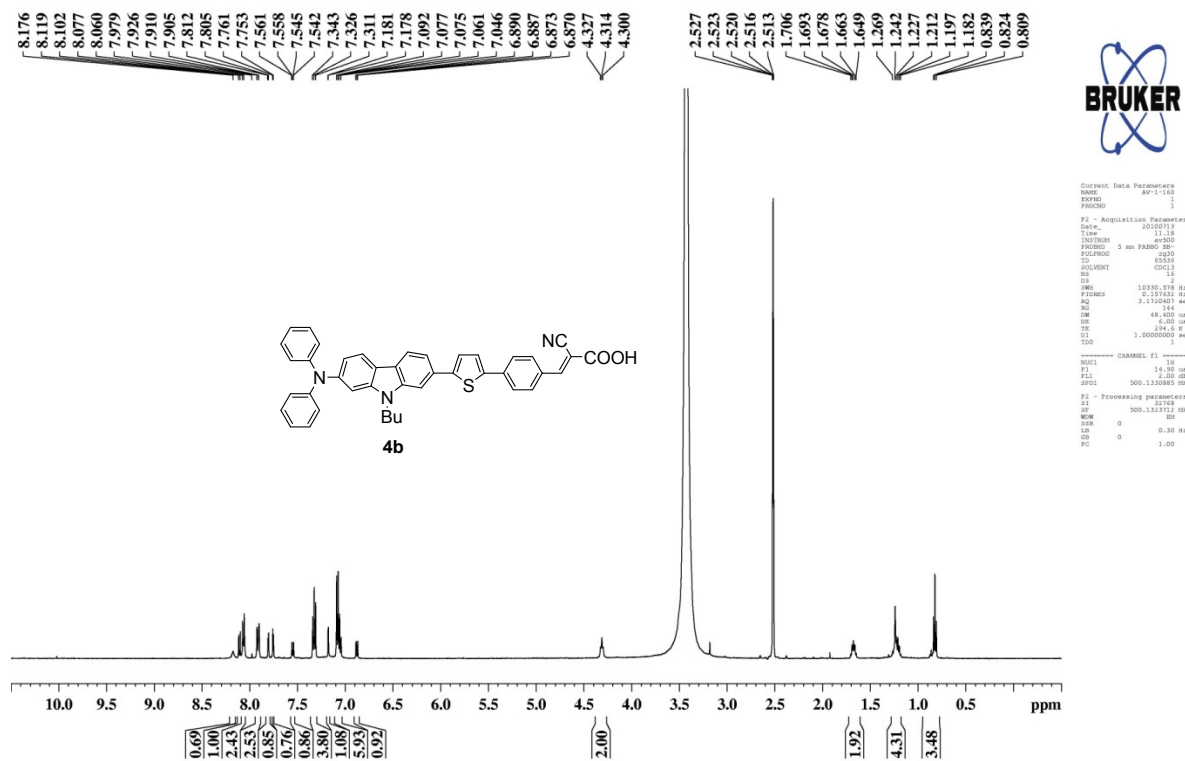

Fig. S40 <sup>1</sup>H NMR spectrum of **4b** recorded in DMSO-*d*<sub>6</sub>.

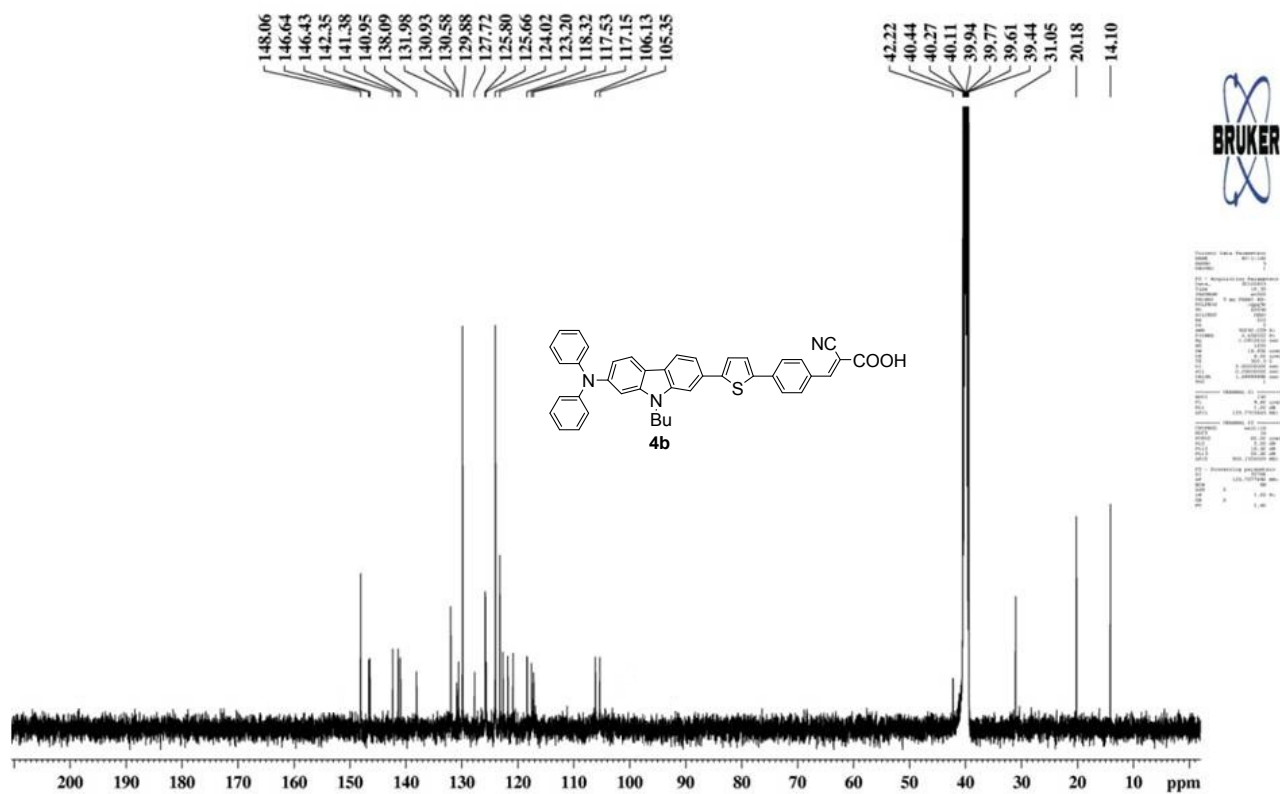

Fig. S41 <sup>13</sup>C NMR spectrum of **4b** recorded in DMSO-*d*<sub>6</sub>.

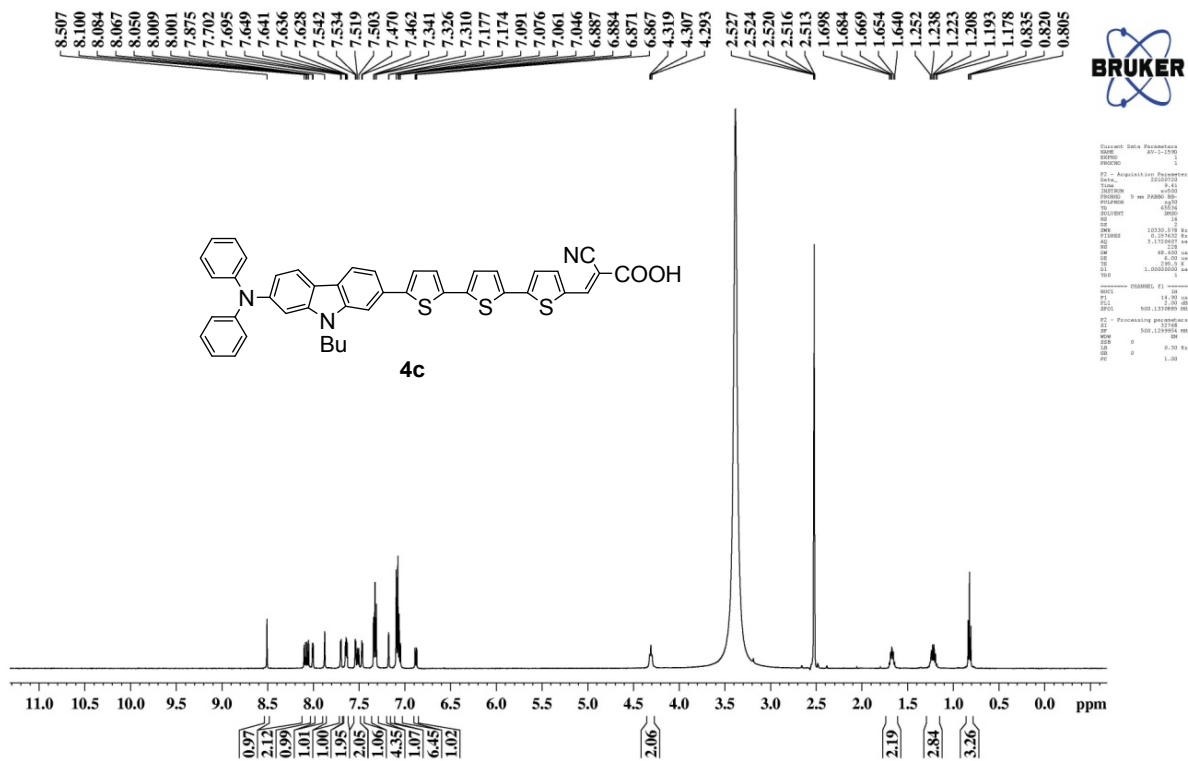

Fig. S42 <sup>1</sup>H NMR spectrum of **4c** recorded in DMSO-*d*<sub>6</sub>.

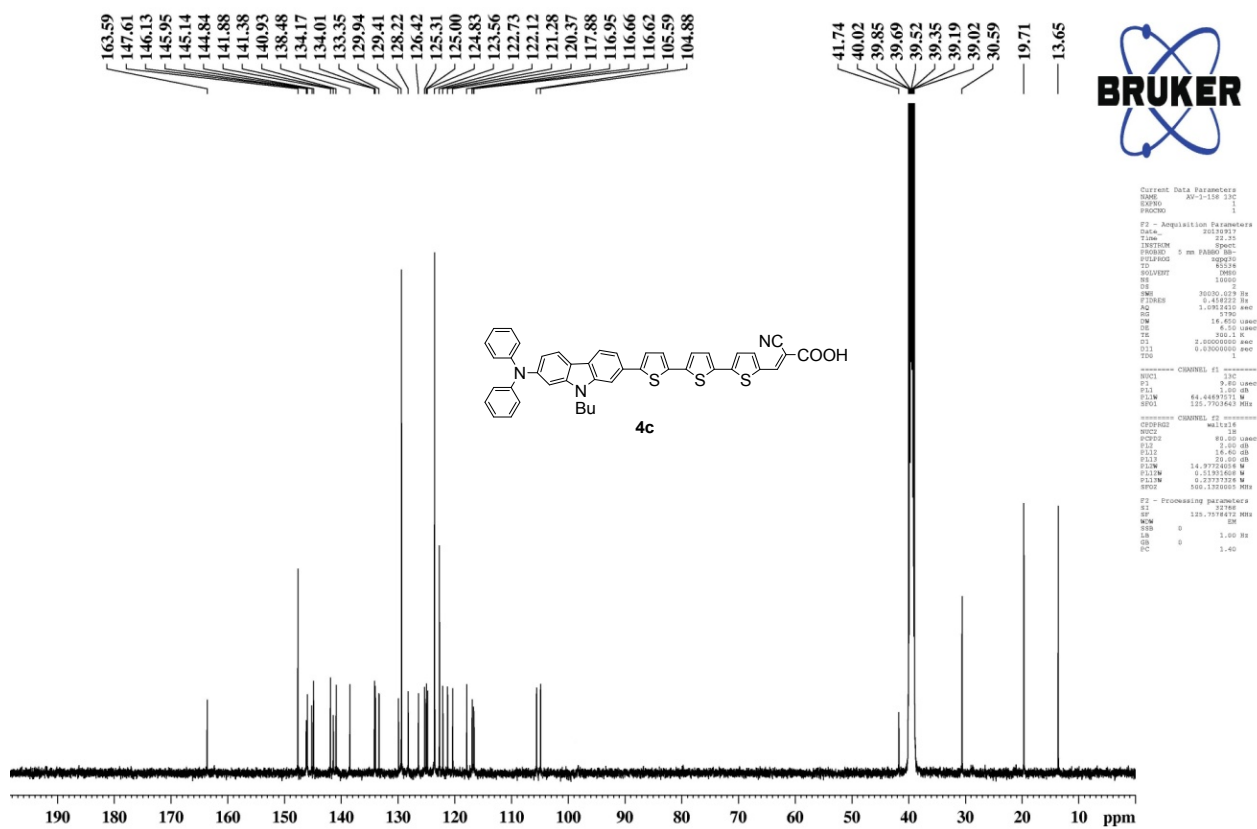

Fig. S43 <sup>13</sup>C NMR spectrum of **4c** recorded in DMSO-*d*<sub>6</sub>.

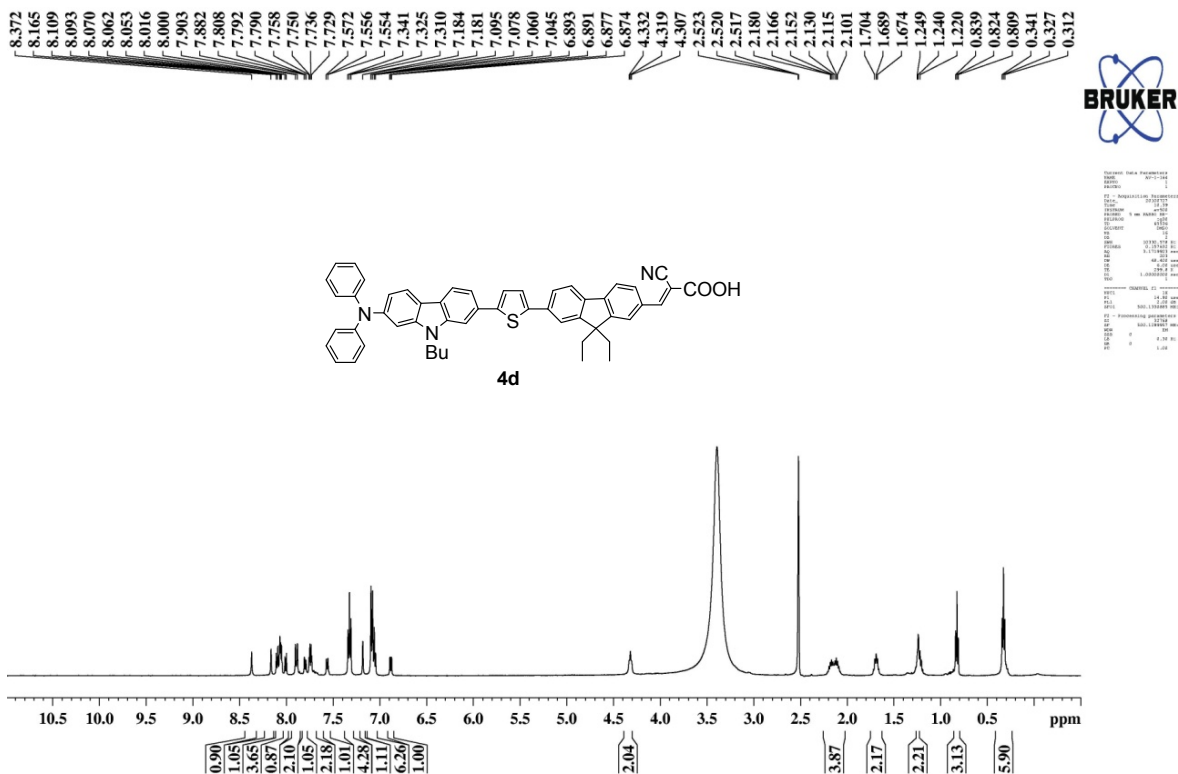

Fig. S44 <sup>1</sup>H NMR spectrum of **4d** recorded in DMSO-*d*<sub>6</sub>.

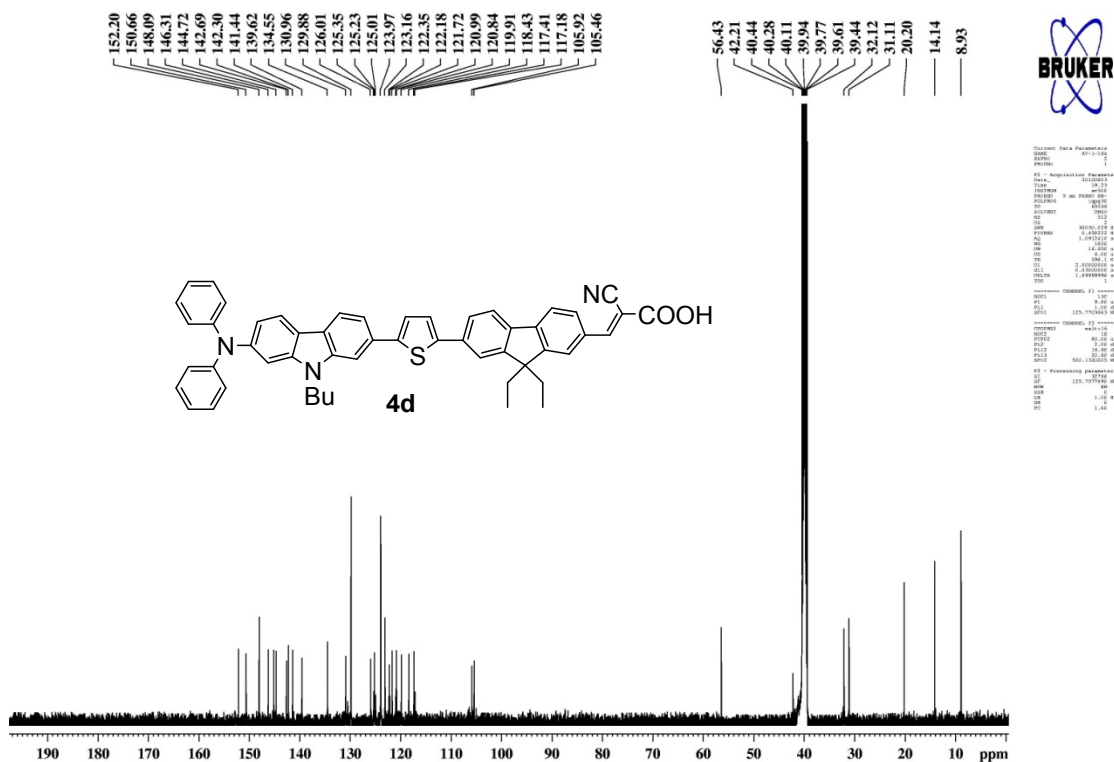

Fig. S45 <sup>13</sup>C NMR spectrum of **4d** recorded in DMSO-*d*<sub>6</sub>.

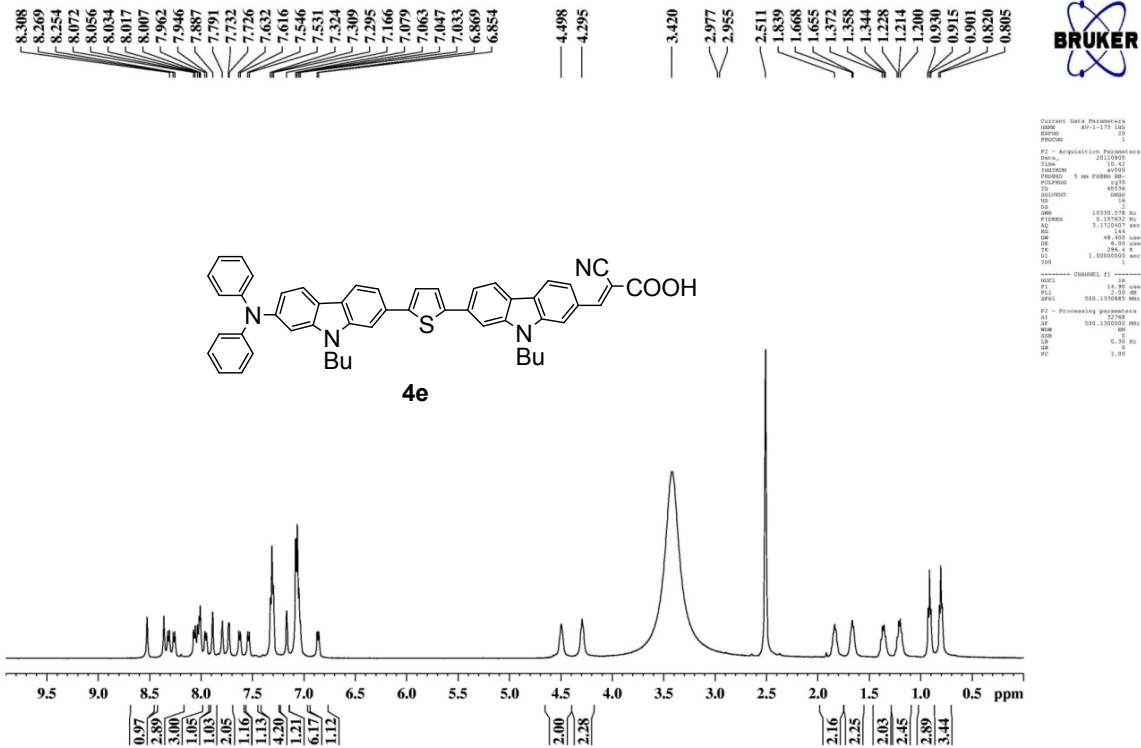

**Fig. S46** <sup>1</sup>H NMR spectrum of **4e** recorded in DMSO-*d*<sub>6</sub>.

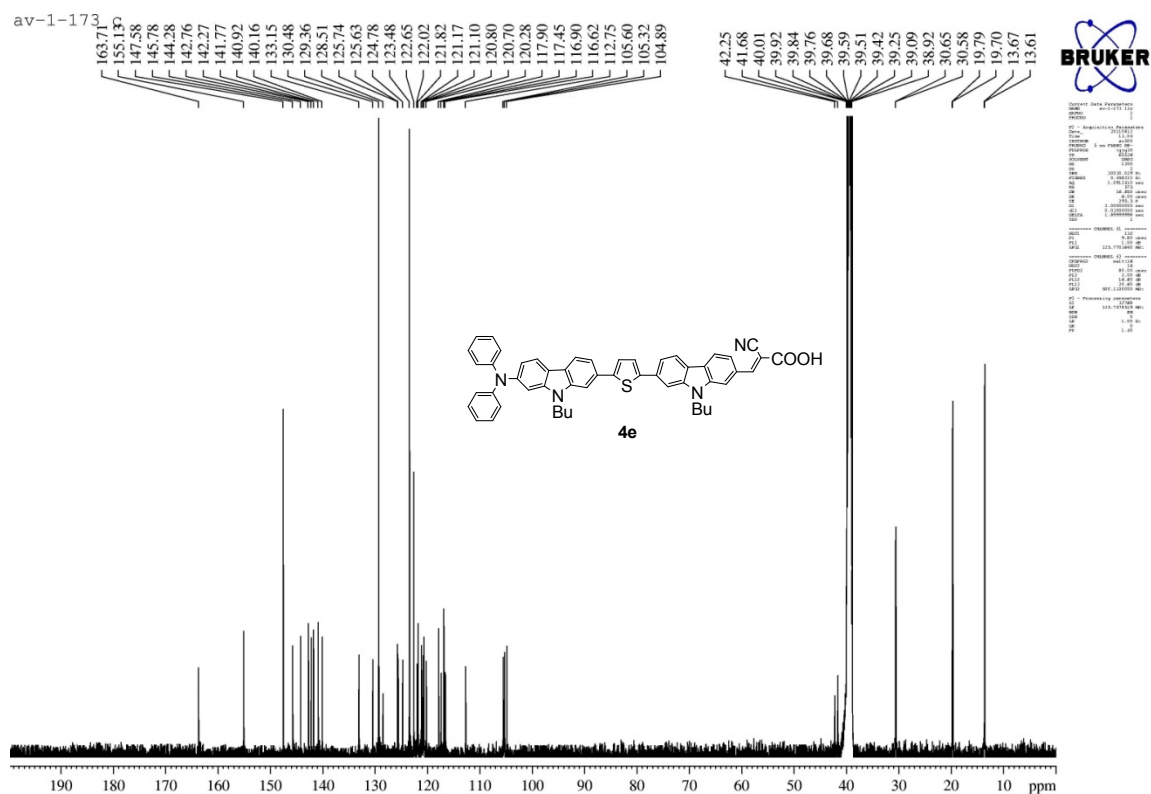

**Fig. S47** <sup>13</sup>C NMR spectrum of **4e** recorded in DMSO-*d*<sub>6</sub>.

**Table S3** Cartesian coordinates for the optimized geometry of **4a**Energy = -2333.31661463 H<sub>a</sub>

| Atom | X            | Y            | Z            |
|------|--------------|--------------|--------------|
| 6    | -4.900722000 | -2.215371000 | 0.525514000  |
| 6    | -5.521139000 | -0.986813000 | 0.197717000  |
| 6    | -4.751563000 | 0.100549000  | -0.236590000 |
| 6    | -3.368542000 | -0.062942000 | -0.319904000 |
| 6    | -2.735484000 | -1.293439000 | 0.001074000  |
| 6    | -3.525638000 | -2.370924000 | 0.419938000  |
| 7    | -2.403934000 | 0.854053000  | -0.723804000 |
| 6    | -1.155270000 | 0.244828000  | -0.647034000 |
| 6    | -1.320349000 | -1.097185000 | -0.204678000 |
| 6    | 0.102162000  | 0.777613000  | -0.922311000 |
| 6    | 1.230182000  | -0.048505000 | -0.778003000 |
| 6    | 1.066607000  | -1.386121000 | -0.344603000 |
| 6    | -0.188547000 | -1.906266000 | -0.057209000 |
| 7    | -6.930348000 | -0.851590000 | 0.322008000  |
| 6    | -7.484045000 | 0.340568000  | 0.863826000  |
| 6    | -7.787466000 | -1.894528000 | -0.122722000 |
| 6    | -8.606218000 | 0.941681000  | 0.271371000  |
| 6    | -9.150329000 | 2.104000000  | 0.814802000  |
| 6    | -8.578674000 | 2.697107000  | 1.941859000  |
| 6    | -7.456801000 | 2.106666000  | 2.527895000  |
| 6    | -6.916122000 | 0.935059000  | 2.002828000  |
| 6    | -7.512512000 | -2.586411000 | -1.313432000 |
| 6    | -8.350576000 | -3.615391000 | -1.738012000 |
| 6    | -9.483287000 | -3.960871000 | -0.998647000 |
| 6    | -9.764260000 | -3.268299000 | 0.180802000  |
| 6    | -8.922698000 | -2.250384000 | 0.623862000  |
| 6    | 5.043638000  | 0.979947000  | -1.155315000 |
| 6    | 4.296050000  | 1.764310000  | -2.005895000 |
| 6    | 2.905513000  | 1.488668000  | -1.965286000 |
| 6    | 2.560019000  | 0.488723000  | -1.081356000 |
| 16   | 3.994167000  | -0.110227000 | -0.270167000 |
| 6    | -2.912315000 | 5.619458000  | 0.896894000  |
| 6    | -2.906946000 | 4.655135000  | -0.293018000 |
| 6    | -2.649849000 | 3.200561000  | 0.117741000  |
| 6    | -2.652374000 | 2.241121000  | -1.081587000 |
| 1    | -5.516957000 | -3.037883000 | 0.869952000  |
| 1    | -5.233966000 | 1.037521000  | -0.488912000 |
| 1    | -3.068108000 | -3.320929000 | 0.680705000  |
| 1    | 0.224506000  | 1.815864000  | -1.210219000 |
| 1    | 1.940277000  | -2.024149000 | -0.257782000 |
| 1    | -0.286780000 | -2.936660000 | 0.271652000  |

|   |               |              |              |
|---|---------------|--------------|--------------|
| 1 | -9.047404000  | 0.491716000  | -0.611641000 |
| 1 | -10.019368000 | 2.554611000  | 0.343831000  |
| 1 | -9.002182000  | 3.605526000  | 2.358922000  |
| 1 | -7.006826000  | 2.550608000  | 3.411450000  |
| 1 | -6.054254000  | 0.471354000  | 2.470903000  |
| 1 | -6.641296000  | -2.313691000 | -1.899289000 |
| 1 | -8.121886000  | -4.140012000 | -2.661335000 |
| 1 | -10.137546000 | -4.758579000 | -1.336349000 |
| 1 | -10.637510000 | -3.530398000 | 0.771402000  |
| 1 | -9.138368000  | -1.726557000 | 1.548993000  |
| 1 | 4.738966000   | 2.491629000  | -2.676966000 |
| 1 | 2.180438000   | 1.982718000  | -2.601543000 |
| 1 | -3.097301000  | 6.648860000  | 0.574392000  |
| 1 | -1.952259000  | 5.602541000  | 1.424442000  |
| 1 | -3.691369000  | 5.351259000  | 1.618860000  |
| 1 | -3.868491000  | 4.719984000  | -0.820237000 |
| 1 | -2.142196000  | 4.970408000  | -1.016144000 |
| 1 | -1.684942000  | 3.121929000  | 0.634435000  |
| 1 | -3.413852000  | 2.875180000  | 0.834786000  |
| 1 | -3.614462000  | 2.289562000  | -1.603533000 |
| 1 | -1.892462000  | 2.541758000  | -1.811050000 |
| 6 | 9.297245000   | 1.019908000  | -0.576727000 |
| 6 | 8.632600000   | 2.148625000  | -1.045925000 |
| 6 | 8.569058000   | -0.146051000 | -0.279127000 |
| 6 | 7.249499000   | 2.146035000  | -1.211824000 |
| 6 | 7.180748000   | -0.152378000 | -0.503177000 |
| 1 | 6.745237000   | 3.048190000  | -1.542411000 |
| 1 | 6.626510000   | -1.070419000 | -0.328803000 |
| 6 | 6.494761000   | 0.987152000  | -0.948439000 |
| 1 | 10.372419000  | 1.035651000  | -0.458815000 |
| 1 | 9.197776000   | 3.046177000  | -1.277987000 |
| 6 | 9.170953000   | -1.405631000 | 0.159894000  |
| 1 | 8.617809000   | -2.283345000 | -0.170770000 |
| 6 | 10.289621000  | -1.696817000 | 0.880664000  |
| 6 | 10.640213000  | -3.083600000 | 1.017136000  |
| 7 | 10.888024000  | -4.216037000 | 1.111763000  |
| 6 | 11.228297000  | -0.780406000 | 1.598585000  |
| 8 | 12.350969000  | -1.099100000 | 1.923747000  |
| 8 | 10.690065000  | 0.420406000  | 1.907487000  |
| 1 | 11.382079000  | 0.901505000  | 2.392590000  |

**Table S4** Cartesian coordinates for the optimized geometry of **4b**Energy = - 2332.02095392 H<sub>a</sub>

| Atom | X            | Y            | Z            |
|------|--------------|--------------|--------------|
| 7    | 7.350352000  | -0.467690000 | -0.160954000 |
| 7    | 2.585775000  | 0.642303000  | 0.655839000  |
| 6    | 9.954351000  | -3.637153000 | 0.940016000  |
| 6    | 10.348159000 | -2.693874000 | -0.018451000 |
| 1    | 11.323132000 | -2.774522000 | -0.494000000 |
| 6    | 9.491282000  | -1.653801000 | -0.388962000 |
| 1    | 9.803618000  | -0.939296000 | -1.145378000 |
| 6    | 8.222586000  | -1.528400000 | 0.209980000  |
| 6    | 7.832908000  | -2.473219000 | 1.178506000  |
| 1    | 6.861057000  | -2.386674000 | 1.655880000  |
| 6    | 8.689777000  | -3.520197000 | 1.530927000  |
| 6    | 7.861437000  | 0.849555000  | -0.342418000 |
| 6    | 8.813536000  | 1.381284000  | 0.547324000  |
| 1    | 9.158188000  | 0.785617000  | 1.387847000  |
| 6    | 9.316506000  | 2.671776000  | 0.355748000  |
| 1    | 10.051658000 | 3.065506000  | 1.054108000  |
| 6    | 8.869077000  | 3.460408000  | -0.711847000 |
| 1    | 9.257778000  | 4.465667000  | -0.854405000 |
| 6    | 7.913800000  | 2.936995000  | -1.593536000 |
| 1    | 7.561647000  | 3.533470000  | -2.432212000 |
| 6    | 7.418223000  | 1.641896000  | -1.418511000 |
| 1    | 6.688625000  | 1.241503000  | -2.117044000 |
| 6    | 5.949693000  | -0.707081000 | -0.270817000 |
| 6    | 5.488601000  | -1.848147000 | -0.977012000 |
| 1    | 6.213285000  | -2.517621000 | -1.430650000 |
| 6    | 4.128195000  | -2.115413000 | -1.094693000 |
| 1    | 3.795008000  | -2.997311000 | -1.636842000 |
| 6    | 3.197304000  | -1.231887000 | -0.523412000 |
| 6    | 3.669278000  | -0.078502000 | 0.164988000  |
| 6    | 5.036905000  | 0.186187000  | 0.309128000  |
| 1    | 5.392233000  | 1.054085000  | 0.854573000  |
| 6    | 1.755946000  | -1.203259000 | -0.432367000 |
| 6    | 0.728953000  | -2.042156000 | -0.891897000 |
| 1    | 0.960541000  | -2.940801000 | -1.458732000 |
| 6    | -0.595557000 | -1.724332000 | -0.605464000 |
| 1    | -1.380517000 | -2.395749000 | -0.943647000 |
| 6    | -0.932671000 | -0.565768000 | 0.144356000  |
| 6    | 0.089927000  | 0.291597000  | 0.597502000  |
| 1    | -0.158318000 | 1.196572000  | 1.141921000  |
| 6    | 1.418027000  | -0.033689000 | 0.311355000  |

|    |               |              |              |
|----|---------------|--------------|--------------|
| 6  | 2.684757000   | 1.881839000  | 1.429453000  |
| 1  | 1.750568000   | 2.006260000  | 1.982915000  |
| 6  | 2.976250000   | 3.135201000  | 0.588184000  |
| 1  | 3.915570000   | 2.991110000  | 0.040456000  |
| 6  | 1.863937000   | 3.529952000  | -0.392574000 |
| 1  | 0.936178000   | 3.715871000  | 0.164935000  |
| 1  | 1.656928000   | 2.694005000  | -1.071739000 |
| 6  | 2.219207000   | 4.773454000  | -1.217334000 |
| 1  | 1.407838000   | 5.037264000  | -1.905762000 |
| 1  | 3.476090000   | 1.749393000  | 2.174910000  |
| 1  | 3.152529000   | 3.959076000  | 1.292790000  |
| 1  | 3.122696000   | 4.607186000  | -1.816593000 |
| 6  | -2.330364000  | -0.249589000 | 0.464217000  |
| 6  | -2.820946000  | 0.534257000  | 1.495409000  |
| 16 | -3.657405000  | -0.864088000 | -0.497161000 |
| 6  | -4.232617000  | 0.633408000  | 1.518215000  |
| 1  | -2.181313000  | 1.004853000  | 2.235087000  |
| 6  | -4.863364000  | -0.070333000 | 0.504402000  |
| 1  | -4.768010000  | 1.198961000  | 2.273493000  |
| 1  | 8.369448000   | -4.239049000 | 2.281803000  |
| 1  | 10.620608000  | -4.449206000 | 1.220426000  |
| 6  | -6.292481000  | -0.192904000 | 0.235964000  |
| 6  | -6.790939000  | -0.986386000 | -0.823171000 |
| 6  | -7.239519000  | 0.491695000  | 1.040206000  |
| 6  | -8.153834000  | -1.086440000 | -1.061919000 |
| 1  | -6.110363000  | -1.534700000 | -1.469120000 |
| 6  | -8.600551000  | 0.391250000  | 0.803258000  |
| 1  | -6.903838000  | 1.113356000  | 1.863985000  |
| 6  | -9.100859000  | -0.403313000 | -0.259750000 |
| 1  | -8.503079000  | -1.704992000 | -1.885458000 |
| 1  | -9.275240000  | 0.937661000  | 1.451329000  |
| 6  | -10.494719000 | -0.576450000 | -0.603296000 |
| 6  | -11.647519000 | -0.070014000 | -0.056724000 |
| 1  | -10.659728000 | -1.227442000 | -1.457880000 |
| 6  | -11.698600000 | 0.807218000  | 1.073707000  |
| 6  | -12.984090000 | -0.398612000 | -0.614634000 |
| 7  | -11.756152000 | 1.518815000  | 1.996888000  |
| 8  | -14.035252000 | 0.040488000  | -0.170275000 |
| 8  | -12.936969000 | -1.238160000 | -1.675885000 |
| 1  | -13.862022000 | -1.380718000 | -1.967951000 |
| 1  | 2.403660000   | 5.641125000  | -0.571929000 |



**Table S5** Cartesian coordinates for the optimized geometry of **4c**Energy = - 3204.25230372 H<sub>a</sub>

| Atom | X             | Y            | Z            |
|------|---------------|--------------|--------------|
| 7    | -9.039067000  | -0.499878000 | 0.154921000  |
| 7    | -4.274065000  | 0.655225000  | -0.598556000 |
| 6    | -11.611271000 | -3.650673000 | -1.067833000 |
| 6    | -12.013792000 | -2.750379000 | -0.072357000 |
| 1    | -12.987019000 | -2.860325000 | 0.400930000  |
| 6    | -11.167366000 | -1.716609000 | 0.337668000  |
| 1    | -11.485872000 | -1.035697000 | 1.121921000  |
| 6    | -9.900986000  | -1.554244000 | -0.257032000 |
| 6    | -9.502345000  | -2.456115000 | -1.262132000 |
| 1    | -8.531883000  | -2.341198000 | -1.736542000 |
| 6    | -10.348835000 | -3.497208000 | -1.654857000 |
| 6    | -9.561675000  | 0.804773000  | 0.384295000  |
| 6    | -10.529223000 | 1.354382000  | -0.477920000 |
| 1    | -10.877160000 | 0.782201000  | -1.333203000 |
| 6    | -11.043732000 | 2.632445000  | -0.240097000 |
| 1    | -11.790533000 | 3.039690000  | -0.918034000 |
| 6    | -10.593470000 | 3.391859000  | 0.847302000  |
| 1    | -10.991443000 | 4.387661000  | 1.026016000  |
| 6    | -9.623368000  | 2.850969000  | 1.701828000  |
| 1    | -9.268662000  | 3.424086000  | 2.555554000  |
| 6    | -9.115578000  | 1.567773000  | 1.480472000  |
| 1    | -8.373933000  | 1.153991000  | 2.158141000  |
| 6    | -7.637683000  | -0.735242000 | 0.267101000  |
| 6    | -7.175895000  | -1.896974000 | 0.937964000  |
| 1    | -7.900384000  | -2.584240000 | 1.364434000  |
| 6    | -5.814997000  | -2.161785000 | 1.056185000  |
| 1    | -5.481026000  | -3.059412000 | 1.571362000  |
| 6    | -4.884561000  | -1.256012000 | 0.520261000  |
| 6    | -5.357459000  | -0.083671000 | -0.134807000 |
| 6    | -6.725312000  | 0.180195000  | -0.277895000 |
| 1    | -7.081101000  | 1.063313000  | -0.798070000 |
| 6    | -3.442751000  | -1.218083000 | 0.439961000  |
| 6    | -2.414886000  | -2.064178000 | 0.883786000  |
| 1    | -2.645679000  | -2.978986000 | 1.424522000  |
| 6    | -1.089998000  | -1.732406000 | 0.615489000  |
| 1    | -0.304627000  | -2.409764000 | 0.940745000  |
| 6    | -0.753211000  | -0.552359000 | -0.100305000 |
| 6    | -1.776962000  | 0.313284000  | -0.535197000 |
| 1    | -1.529362000  | 1.234723000  | -1.051709000 |
| 6    | -3.105399000  | -0.025884000 | -0.267153000 |
| 6    | -4.372116000  | 1.921211000  | -1.328081000 |

|    |               |              |              |
|----|---------------|--------------|--------------|
| 1  | -3.435246000  | 2.067023000  | -1.871712000 |
| 6  | -4.668706000  | 3.143326000  | -0.443573000 |
| 1  | -5.617293000  | 2.985470000  | 0.084082000  |
| 6  | -3.568536000  | 3.490195000  | 0.568182000  |
| 1  | -2.629814000  | 3.684332000  | 0.032339000  |
| 1  | -3.382282000  | 2.627570000  | 1.219452000  |
| 6  | -3.922552000  | 4.708036000  | 1.430961000  |
| 1  | -3.118792000  | 4.938806000  | 2.139886000  |
| 1  | -4.087807000  | 5.599672000  | 0.813604000  |
| 1  | -5.159432000  | 1.814999000  | -2.082007000 |
| 1  | -4.828323000  | 3.994951000  | -1.118557000 |
| 1  | -4.836625000  | 4.531743000  | 2.011081000  |
| 6  | 0.644748000   | -0.223402000 | -0.404515000 |
| 6  | 1.138676000   | 0.595568000  | -1.405336000 |
| 16 | 1.970653000   | -0.876850000 | 0.539658000  |
| 6  | 2.551341000   | 0.693436000  | -1.424333000 |
| 1  | 0.500970000   | 1.092762000  | -2.128989000 |
| 6  | 3.174638000   | -0.049507000 | -0.434715000 |
| 1  | 3.092684000   | 1.285165000  | -2.157156000 |
| 1  | -10.022259000 | -4.182520000 | -2.433872000 |
| 1  | -12.269413000 | -4.457900000 | -1.379645000 |
| 6  | 4.585911000   | -0.197365000 | -0.164063000 |
| 6  | 5.211168000   | -0.948416000 | 0.823283000  |
| 16 | 5.781113000   | 0.629059000  | -1.144490000 |
| 6  | 6.619959000   | -0.864943000 | 0.793647000  |
| 1  | 4.669724000   | -1.545523000 | 1.550658000  |
| 6  | 7.111897000   | -0.049630000 | -0.216074000 |
| 1  | 7.256114000   | -1.394068000 | 1.497244000  |
| 6  | 8.477850000   | 0.260567000  | -0.546307000 |
| 6  | 8.951913000   | 1.069501000  | -1.581798000 |
| 16 | 9.803397000   | -0.396920000 | 0.387122000  |
| 6  | 10.349757000  | 1.156365000  | -1.619653000 |
| 1  | 8.302333000   | 1.577419000  | -2.287756000 |
| 6  | 10.995921000  | 0.420621000  | -0.621471000 |
| 1  | 10.902606000  | 1.735965000  | -2.353218000 |
| 6  | 12.408109000  | 0.369959000  | -0.483214000 |
| 6  | 13.213201000  | -0.297974000 | 0.415557000  |
| 1  | 12.932686000  | 0.968033000  | -1.224518000 |
| 6  | 12.700302000  | -1.129239000 | 1.458131000  |
| 6  | 14.687453000  | -0.204353000 | 0.367679000  |
| 7  | 12.270798000  | -1.805509000 | 2.308005000  |
| 8  | 15.438140000  | -0.785455000 | 1.140209000  |
| 8  | 15.145329000  | 0.596696000  | -0.626391000 |
| 1  | 16.123756000  | 0.589744000  | -0.568968000 |

**Table S6** Cartesian coordinates for the optimized geometry of **4d**Energy = -2759.76270650 H<sub>a</sub>

| Atom | X            | Y            | Z            |
|------|--------------|--------------|--------------|
| 7    | 9.855038000  | -0.271814000 | -0.139719000 |
| 7    | 5.024768000  | 0.558449000  | 0.625237000  |
| 6    | 12.663973000 | -3.242071000 | 1.011707000  |
| 6    | 12.989852000 | -2.298040000 | 0.028715000  |
| 1    | 13.965048000 | -2.326570000 | -0.452320000 |
| 6    | 12.065165000 | -1.324565000 | -0.358946000 |
| 1    | 12.325741000 | -0.609353000 | -1.134129000 |
| 6    | 10.795150000 | -1.266924000 | 0.247509000  |
| 6    | 10.473034000 | -2.212681000 | 1.239507000  |
| 1    | 9.500280000  | -2.178121000 | 1.721553000  |
| 6    | 11.397942000 | -3.193796000 | 1.609178000  |
| 6    | 10.279978000 | 1.072631000  | -0.340213000 |
| 6    | 11.203134000 | 1.673519000  | 0.536223000  |
| 1    | 11.591555000 | 1.109720000  | 1.379688000  |
| 6    | 11.621301000 | 2.991344000  | 0.327561000  |
| 1    | 12.334883000 | 3.438427000  | 1.016079000  |
| 6    | 11.116481000 | 3.738554000  | -0.744204000 |
| 1    | 11.438300000 | 4.765284000  | -0.899913000 |
| 6    | 10.190507000 | 3.145578000  | -1.613140000 |
| 1    | 9.794422000  | 3.709254000  | -2.454856000 |
| 6    | 9.779841000  | 1.823563000  | -1.421151000 |
| 1    | 9.071719000  | 1.370057000  | -2.109080000 |
| 6    | 8.472793000  | -0.603404000 | -0.247450000 |
| 6    | 8.087706000  | -1.785684000 | -0.930236000 |
| 1    | 8.854486000  | -2.419323000 | -1.365694000 |
| 6    | 6.746545000  | -2.137495000 | -1.051861000 |
| 1    | 6.472428000  | -3.048869000 | -1.578240000 |
| 6    | 5.758883000  | -1.299778000 | -0.508588000 |
| 6    | 6.154465000  | -0.106872000 | 0.159956000  |
| 6    | 7.502175000  | 0.243644000  | 0.307914000  |
| 1    | 7.799090000  | 1.144031000  | 0.835308000  |
| 6    | 4.316700000  | -1.352947000 | -0.434331000 |
| 6    | 3.345904000  | -2.256855000 | -0.891402000 |
| 1    | 3.635951000  | -3.151526000 | -1.437298000 |
| 6    | 2.001232000  | -2.008474000 | -0.630538000 |
| 1    | 1.261021000  | -2.729970000 | -0.966344000 |
| 6    | 1.585814000  | -0.854981000 | 0.087300000  |
| 6    | 2.552181000  | 0.066829000  | 0.536896000  |
| 1    | 2.244788000  | 0.969004000  | 1.054861000  |
| 6    | 3.901731000  | -0.190358000 | 0.280125000  |
| 6    | 5.044036000  | 1.817596000  | 1.372843000  |

|    |               |              |              |
|----|---------------|--------------|--------------|
| 1  | 4.099302000   | 1.898639000  | 1.916528000  |
| 6  | 5.268290000   | 3.067686000  | 0.505798000  |
| 1  | 6.220859000   | 2.968718000  | -0.029050000 |
| 6  | 4.145202000   | 3.369463000  | -0.495031000 |
| 1  | 3.201816000   | 3.512477000  | 0.048725000  |
| 1  | 3.997212000   | 2.505191000  | -1.153604000 |
| 6  | 4.433693000   | 4.610847000  | -1.348684000 |
| 1  | 3.613993000   | 4.810496000  | -2.048736000 |
| 1  | 5.835394000   | 1.747979000  | 2.126909000  |
| 1  | 5.385732000   | 3.916827000  | 1.192411000  |
| 1  | 5.350167000   | 4.482554000  | -1.937477000 |
| 6  | 0.164257000   | -0.612420000 | 0.371605000  |
| 6  | -0.399797000  | 0.171882000  | 1.361153000  |
| 16 | -1.102982000  | -1.342035000 | -0.595865000 |
| 6  | -1.819536000  | 0.182374000  | 1.349023000  |
| 1  | 0.190257000   | 0.703620000  | 2.101273000  |
| 6  | -2.378384000  | -0.596020000 | 0.351871000  |
| 1  | -2.412404000  | 0.724315000  | 2.079454000  |
| 1  | 11.129608000  | -3.914400000 | 2.378540000  |
| 1  | 13.383424000  | -4.002201000 | 1.305857000  |
| 6  | -3.796539000  | -0.823568000 | 0.052274000  |
| 6  | -4.214225000  | -1.931437000 | -0.724995000 |
| 6  | -4.779231000  | 0.069947000  | 0.543606000  |
| 1  | -3.477783000  | -2.638888000 | -1.097727000 |
| 6  | -5.559794000  | -2.155398000 | -1.009178000 |
| 6  | -6.121337000  | -0.153710000 | 0.269572000  |
| 1  | -4.477180000  | 0.939089000  | 1.121474000  |
| 1  | -5.851670000  | -3.016331000 | -1.605777000 |
| 6  | -6.518059000  | -1.264102000 | -0.508002000 |
| 6  | -7.330617000  | 0.678408000  | 0.696594000  |
| 6  | -7.971857000  | -1.243486000 | -0.640420000 |
| 6  | -8.470540000  | -0.115233000 | 0.056800000  |
| 6  | -7.259780000  | 2.135840000  | 0.150071000  |
| 6  | -7.470030000  | 0.752044000  | 2.246750000  |
| 6  | -8.846313000  | -2.114104000 | -1.306810000 |
| 6  | -9.827730000  | 0.150166000  | 0.091099000  |
| 1  | -8.167250000  | 2.657670000  | 0.476764000  |
| 1  | -6.420745000  | 2.636390000  | 0.648761000  |
| 6  | -7.107364000  | 2.287783000  | -1.367798000 |
| 1  | -6.621866000  | 1.334616000  | 2.627371000  |
| 1  | -8.370586000  | 1.335845000  | 2.473469000  |
| 6  | -7.534824000  | -0.588227000 | 2.988827000  |
| 1  | -8.473976000  | -2.982615000 | -1.844035000 |
| 6  | -10.210328000 | -1.844989000 | -1.270741000 |
| 6  | -10.731853000 | -0.717716000 | -0.580544000 |
| 1  | -10.192216000 | 1.018046000  | 0.628666000  |

|   |               |              |              |
|---|---------------|--------------|--------------|
| 1 | -7.074563000  | 3.350649000  | -1.634156000 |
| 1 | -7.946471000  | 1.839967000  | -1.910935000 |
| 1 | -6.183369000  | 1.828014000  | -1.734152000 |
| 1 | -7.622444000  | -0.412897000 | 4.067296000  |
| 1 | -6.634352000  | -1.189812000 | 2.825449000  |
| 1 | -8.400292000  | -1.185806000 | 2.682665000  |
| 1 | -10.900304000 | -2.511402000 | -1.782748000 |
| 6 | -12.167950000 | -0.550009000 | -0.631684000 |
| 6 | -13.007388000 | 0.400095000  | -0.104911000 |
| 1 | -12.680116000 | -1.322465000 | -1.199015000 |
| 6 | -12.584097000 | 1.519258000  | 0.681067000  |
| 7 | -12.250762000 | 2.435242000  | 1.322848000  |
| 6 | -14.475805000 | 0.346052000  | -0.318381000 |
| 8 | -15.260535000 | 1.173897000  | 0.122465000  |
| 8 | -14.877477000 | -0.715127000 | -1.057637000 |
| 1 | -15.851493000 | -0.649210000 | -1.146725000 |
| 1 | 4.562562000   | 5.503579000  | -0.724274000 |

**Table S7** Cartesian coordinates for the optimized geometry of **4e**Energy = -2775.81289855 H<sub>a</sub>

| Atom | X            | Y            | Z            |
|------|--------------|--------------|--------------|
| 7    | 9.805048000  | -0.446238000 | -0.095775000 |
| 7    | 4.994324000  | 0.496333000  | 0.668306000  |
| 6    | 12.254962000 | -3.912303000 | 0.076062000  |
| 6    | 12.753466000 | -2.714665000 | -0.453896000 |
| 1    | 13.771636000 | -2.668620000 | -0.833820000 |
| 6    | 11.948306000 | -1.574289000 | -0.518486000 |
| 1    | 12.344101000 | -0.657786000 | -0.946796000 |
| 6    | 10.625627000 | -1.606171000 | -0.034526000 |
| 6    | 10.130488000 | -2.809070000 | 0.505216000  |
| 1    | 9.115740000  | -2.850520000 | 0.890141000  |
| 6    | 10.937540000 | -3.949840000 | 0.549948000  |
| 6    | 10.346039000 | 0.832871000  | 0.218684000  |
| 6    | 11.231481000 | 0.994991000  | 1.301065000  |
| 1    | 11.500912000 | 0.137324000  | 1.910993000  |
| 6    | 11.763910000 | 2.253747000  | 1.595827000  |
| 1    | 12.446529000 | 2.359153000  | 2.436132000  |
| 6    | 11.412529000 | 3.374106000  | 0.831867000  |
| 1    | 11.824126000 | 4.352454000  | 1.067300000  |
| 6    | 10.522429000 | 3.217562000  | -0.238945000 |
| 1    | 10.244565000 | 4.075618000  | -0.847012000 |
| 6    | 9.998741000  | 1.959843000  | -0.550502000 |
| 1    | 9.321659000  | 1.848594000  | -1.392761000 |
| 6    | 8.416875000  | -0.574736000 | -0.398880000 |
| 6    | 8.011174000  | -1.377703000 | -1.495247000 |
| 1    | 8.766984000  | -1.876145000 | -2.094799000 |
| 6    | 6.664056000  | -1.531929000 | -1.809918000 |
| 1    | 6.373456000  | -2.154811000 | -2.652731000 |
| 6    | 5.693515000  | -0.866890000 | -1.043113000 |
| 6    | 6.111620000  | -0.047387000 | 0.042846000  |
| 6    | 7.463145000  | 0.096753000  | 0.380324000  |
| 1    | 7.773604000  | 0.705886000  | 1.222623000  |
| 6    | 4.249636000  | -0.813288000 | -1.065830000 |
| 6    | 3.262016000  | -1.395361000 | -1.874541000 |
| 1    | 3.536602000  | -2.044502000 | -2.702650000 |
| 6    | 1.919254000  | -1.149904000 | -1.600289000 |
| 1    | 1.162308000  | -1.629628000 | -2.215288000 |
| 6    | 1.524287000  | -0.318964000 | -0.518037000 |
| 6    | 2.508873000  | 0.284308000  | 0.289181000  |
| 1    | 2.219036000  | 0.946908000  | 1.097838000  |
| 6    | 3.855734000  | 0.031038000  | 0.013775000  |
| 6    | 5.036529000  | 1.388699000  | 1.828510000  |

|    |               |              |              |
|----|---------------|--------------|--------------|
| 1  | 4.062638000   | 1.341781000  | 2.322474000  |
| 6  | 5.394172000   | 2.846775000  | 1.495742000  |
| 1  | 6.367298000   | 2.872582000  | 0.989878000  |
| 6  | 4.352513000   | 3.588904000  | 0.647711000  |
| 1  | 3.389586000   | 3.590404000  | 1.175734000  |
| 1  | 4.190543000   | 3.049553000  | -0.293327000 |
| 6  | 4.763805000   | 5.033410000  | 0.336546000  |
| 1  | 4.000583000   | 5.541786000  | -0.264230000 |
| 1  | 5.767961000   | 0.984345000  | 2.536335000  |
| 1  | 5.527843000   | 3.370721000  | 2.451735000  |
| 1  | 5.705193000   | 5.066621000  | -0.225492000 |
| 6  | 0.103554000   | -0.088314000 | -0.217937000 |
| 6  | -0.474281000  | 0.283212000  | 0.981774000  |
| 16 | -1.139453000  | -0.259857000 | -1.442587000 |
| 6  | -1.886189000  | 0.421692000  | 0.922817000  |
| 1  | 0.098466000   | 0.435963000  | 1.891266000  |
| 6  | -2.424119000  | 0.163824000  | -0.324181000 |
| 1  | -2.487561000  | 0.715038000  | 1.777629000  |
| 1  | 10.535556000  | -4.868748000 | 0.971021000  |
| 1  | 12.881513000  | -4.799775000 | 0.117985000  |
| 6  | -3.832491000  | 0.195238000  | -0.740080000 |
| 6  | -4.185523000  | 0.324022000  | -2.114274000 |
| 6  | -4.845850000  | 0.095174000  | 0.231012000  |
| 1  | -3.404159000  | 0.413946000  | -2.864111000 |
| 6  | -5.512146000  | 0.362356000  | -2.521683000 |
| 6  | -6.181707000  | 0.144252000  | -0.180896000 |
| 1  | -4.591340000  | -0.039642000 | 1.276329000  |
| 1  | -5.755338000  | 0.466171000  | -3.576273000 |
| 6  | -6.531184000  | 0.276191000  | -1.557464000 |
| 7  | -7.340276000  | 0.079733000  | 0.584282000  |
| 6  | -7.968148000  | 0.300993000  | -1.618103000 |
| 6  | -8.432653000  | 0.179903000  | -0.270274000 |
| 6  | -7.422702000  | -0.020809000 | 2.044974000  |
| 6  | -8.899812000  | 0.427445000  | -2.662481000 |
| 6  | -9.789006000  | 0.189243000  | 0.042402000  |
| 1  | -8.198727000  | 0.673569000  | 2.382590000  |
| 1  | -6.477318000  | 0.341878000  | 2.456516000  |
| 6  | -7.728777000  | -1.431546000 | 2.572036000  |
| 1  | -8.568843000  | 0.520486000  | -3.693643000 |
| 6  | -10.253101000 | 0.436168000  | -2.357102000 |
| 6  | -10.722015000 | 0.320022000  | -1.013342000 |
| 1  | -10.114436000 | 0.103972000  | 1.070976000  |
| 1  | -7.896063000  | -1.335964000 | 3.653093000  |
| 1  | -8.676348000  | -1.780476000 | 2.143249000  |
| 6  | -6.629055000  | -2.470354000 | 2.314334000  |
| 1  | -10.983405000 | 0.533757000  | -3.156095000 |

|   |               |              |              |
|---|---------------|--------------|--------------|
| 1 | -5.690184000  | -2.124108000 | 2.766934000  |
| 1 | -6.442821000  | -2.552350000 | 1.236448000  |
| 6 | -6.981716000  | -3.854734000 | 2.872827000  |
| 1 | -7.145363000  | -3.818350000 | 3.956979000  |
| 1 | -6.177454000  | -4.574741000 | 2.681782000  |
| 1 | -7.896360000  | -4.248183000 | 2.412548000  |
| 6 | -12.159115000 | 0.350707000  | -0.844597000 |
| 6 | -12.966983000 | 0.247678000  | 0.260841000  |
| 1 | -12.703640000 | 0.482655000  | -1.775712000 |
| 6 | -12.498872000 | 0.059967000  | 1.600879000  |
| 7 | -12.125900000 | -0.094953000 | 2.695949000  |
| 6 | -14.445886000 | 0.323438000  | 0.156031000  |
| 8 | -15.201418000 | 0.245503000  | 1.114649000  |
| 8 | -14.893980000 | 0.489620000  | -1.111282000 |
| 1 | -15.872196000 | 0.532814000  | -1.063985000 |
| 1 | 4.905501000   | 5.615310000  | 1.255685000  |
